# Supplementary material for: The High Ratio of the Plasma miR-96/miR-99b Correlated With Poor Prognosis in Patients With Metastatic Colorectal Cancer
Source: Front Mol Biosci. 2022 Jan 3;8:799060. doi: 10.3389/fmolb.2021.799060 (PMC8762210; doi:10.3389/fmolb.2021.799060)
Supplement: Supplementary file 2 [file Table3.XLSX]

## Sheet: Sheet3
Supplementary Table 3 The expression of miR-96、miR-99b、miR-155、let-7a and let-7b in literature.
miRNA	Tumor	Methods	Expression	Function	References
miR-96	Colorectal cancer	Genetic testing.RT-PCR	up	Associated with the MMR	PMID: 19922656
	Colorectal cancer	miRNA chip,RT-PCR	up	related to tumor stage, prognosis and treatment	PMID: 26863633
	Lung cancer	Cell viability assay, cell migration assay,RT-PCR,WB, transfection, luciferase assay	up	Tumor proliferation and migration can be promoted by regulating LM07.	PMID: 28026121
	Prostate cancer	RT-PCR, proliferation assay,WB	up	It was associated with stage, lymph node metastasis and drug resistance	PMID: 23951320
	Breast cancer	miRNA chip,RT-PCR	up	a biomarker for early diagnosis of breast cancer	PMID: 26056355
	Colorectal cancer	RT-PCR	up	Involves in the pathophysiological process of Colorectal cancer	PMID: 25925209
	Colorectal cancer	RT-PCR,ROC	up	It was related to clinical stage, tumor recurrence and prognosis	PMID: 27044381
	Colorectal cancer	Cell proliferation assay,RT-PCR clone formation assay, cell cycle assay,WB assay, luciferase assay	up	By regulating the expression of P53, F0x01 and F0x03A genes, proliferation and metastasis were promoted	PMID: 25369914
	Prostate cancer	miRNA chip,RT-PCR	up	It is related to tumor recurrence after operation and has diagnostic and prognostic value	PMID: 19676045
	Colorectal cancer	RT-PCR	up	Involved in tumor development	PMID: 22844381
	Colorectal cancer	miRNA chip,RT-PCR	up	/	PMID: 23673725
	Colorectal cancer	Gene mutation detection,RT-PCR,WB, transfection, proliferation cycle determination, clone formation assay, apoptosis assay	down	Regulates cell growth and is associated with prognosis	PMID: 25256312
	Pancreatic cancer	RT-PCR, transfection, proliferation, apoptosis and cycle assay, cell colony formation, cell migration and invasion assay, immunohistochemistry, in vitro assay	down	Through the regulation of KRAS gene expression, the metastasis was inhibited	PMID: 20610624
miR-99a/b	Breast cancer	RT-PCR, luciferase assay, transfection,WB, cell cycle assay, cell scratch and adhesion assay	/	The interstitial transformation of breast epithelial cells induced by regulating TGF- B promotes the proliferation and migration of breast cancer cells	PMID: 22299047
	Esophagus cancer	RT-PCR	up	molecular marker of esophageal cancer	PMID: 23761828
	Hepatic carcinoma	RT-PCR, transfection, luciferase assay, invasion assay,WB, immunohistochemistry, migration assay	up	By regulating the high expression of CLDNU, tumor metastasis can be promoted, which is related to the difference of 0S and DFS	PMID: 26134929
	Prostate cancer	MRNA microarray, deep sequencing, transfection,WB,PCR, clone formation, deep sequencing, luciferase reporting assay, ELISA	down	Inhibits the occurrence and progression of tumors	PMID: 21212412
	Lung cancer	Transfection,RT-PCR,miRNA microarray, luciferase assay,WB, clone formation, cell proliferation assay	down	By modulating FGFR3, tumor progression was inhibited	PMID: 22969861
miR-155	Colorectal cancer	Transfection, cell proliferation assay.	up	Promote the proliferation, invasion and metastasis of Colorectal cancer cells	PMID: 26261588
	Lung cancer	RT-PCR, cell invasion assay	up	By regulating S0CSLS0CS6 and PTEN, it promotes the development of NSCLC	PMID: 27811366
	Lung cancer	RT-PCR, transfection,WB, cell proliferation assay, cell cycle assay, luciferase assay	up	Promote the proliferation of NSCLC cells by inhibiting FOXOL	PMID: 26548866
	Colorectal cancer	RT-PCR	up	It can be used as a marker for diagnosis and prognosis of Colorectal cancer	PMID: 25528214
	Colorectal cancer	RT-PCR	up	Involves in the pathophysiological process of Colorectal cancer	PMID: 25925209
	Gastric cancer	Transfection, cell proliferation assay. RT-PCR, invasion assay, apoptosis assay, cell cycle assay,WB	down	It plays an antitumor role by regulating cyclin D1	PMID: 26955820
let-7a	Colorectal cancer	RT-PCR, genetic testing, survival analysis	/	And the efficacy of anti-EGFR therapy	PMID: 22584434
	Colorectal cancer	RT-PCR, immunohistochemistry, prognostic characteristic spectrum analysis	up	Through the regulation of KRAS gene expression, promote metastasis	PMID: 22120473
	Colorectal cancer	Cell viability detection, semi-quantitative RT-PCR transfection,WB	down	Promote the growth of Colorectal cancer cells	PMID: 16651716
	Colorectal cancer	Cell transfection,RT-PCR,CCK-8, apoptosis assay, in vitro matrix gel invasion assay,WB, luciferase assay	down	The growth and metastasis of tumor cells were inhibited by the regulation of RTKN	PMID: 27498032
	Colorectal cancer	RT-PCR, tissue microarray, immunohistochemistry, gene mutation detection, laser capture microdissection	down	Inhibition of anti-tumor immune response in patients with Colorectal cancer	PMID: 27737877
	gastric cancer	RT-PCR, cell transfection,WB, cell proliferation, clone formation assay, cell migration and scratch assay, cell invasion assay, in vitro assay	down	Cell growth, migration and invasion were inhibited by PKM2	PMID: 26745603
	Colorectal cancer	WB, invasion and migration assay, soft AGAR assay,RNA immunoprecipitation and RT-qPCR, luciferase assay	down	By regulating the expression of KRAS and LIN28 genes, metastasis was inhibited	PMID: 21625210
	Colorectal cancer	miRNA chip,RT-qPCR	down	It can be used as a noninvasive biomarker for early diagnosis of Colorectal cancer	PMID: 26793011
let'7b	Colorectal cancer	Cell viability detection, semi-quantitative RT-PCR, transfection,WB	down	Promote the growth of Colorectal cancer cells	PMID: 16651716
	Glioma	Transfection, cell proliferation, clone formation, invasion assay, RT-PCR, WB. In vitro assay, immunohistochemistry	down	Through the regulation of the expression of LIN28 gene, and then inhibit the metastasis	PMID: 23846349
	Colorectal cancer	WB, invasion and migration assay, soft AGAR assay,RNA immunoprecipitation and RT-qPCR, luciferase assay	down	By regulating the expression of KRAS and LIN28 genes, metastasis was inhibited	PMID: 21625210
	Melanoma	RT-qPCR, luciferase assay, cell cycle and clone formation	down	Growth and proliferation are inhibited by the regulation of cyclins Di, D3 and A	PMID: 18379589
