# Supplementary material for: The High Ratio of the Plasma miR-96/miR-99b Correlated With Poor Prognosis in Patients With Metastatic Colorectal Cancer
Source: Front Mol Biosci. 2022 Jan 3;8:799060. doi: 10.3389/fmolb.2021.799060 (PMC8762210; doi:10.3389/fmolb.2021.799060)
Supplement: Supplementary file 11 [file Table9.XLS]

## Sheet: mTOR-B图
Category	Term	Count	%	PValue	Genes	List Total	Pop Hits	Pop Total	Fold Enrichment	Bonferroni	Benjamini	FDR
KEGG_PATHWAY	hsa05217:Basal cell carcinoma	25	92.5926	2.31509e-51	WNT5A, WNT3A, WNT2, WNT1, WNT4, WNT3, WNT6, WNT8A, WNT8B, DVL2, DVL3, FZD8, WNT10A, WNT10B, FZD1, FZD3, FZD2, FZD5, FZD4, FZD7, WNT2B, FZD6, WNT7B, WNT9B, WNT9A	27	54	6879	117.953	2.31509e-50	2.31509e-50	1.39014e-48
KEGG_PATHWAY	hsa04310:Wnt signaling pathway	27	100	6.15736e-46	WNT5A, WNT3A, WNT2, WNT1, WNT4, WNT3, WNT6, WNT8A, WNT8B, DVL2, DVL3, WNT10A, FZD8, WNT10B, FZD1, FZD3, FZD2, FZD5, FZD4, FZD7, WNT2B, FZD6, WNT7B, WNT9B, LRP6, WNT9A, LRP5	27	138	6879	49.8478	6.15736e-45	3.07868e-45	3.69731e-43
KEGG_PATHWAY	hsa04916:Melanogenesis	25	92.5926	1.29902e-43	WNT5A, WNT3A, WNT2, WNT1, WNT4, WNT3, WNT6, WNT8A, WNT8B, DVL2, DVL3, FZD8, WNT10A, WNT10B, FZD1, FZD3, FZD2, FZD5, FZD4, FZD7, WNT2B, FZD6, WNT7B, WNT9B, WNT9A	27	100	6879	63.6944	1.29902e-42	4.33005e-43	7.8002e-41
KEGG_PATHWAY	hsa04550:Signaling pathways regulating pluripotency of stem cells	25	92.5926	1.02898e-39	WNT5A, WNT3A, WNT2, WNT1, WNT4, WNT3, WNT6, WNT8A, WNT8B, DVL2, DVL3, FZD8, WNT10A, WNT10B, FZD1, FZD3, FZD2, FZD5, FZD4, FZD7, WNT2B, FZD6, WNT7B, WNT9B, WNT9A	27	140	6879	45.496	1.02898e-38	2.57245e-39	6.17873e-37
KEGG_PATHWAY	hsa04390:Hippo signaling pathway	25	92.5926	7.40281e-39	WNT5A, WNT3A, WNT2, WNT1, WNT4, WNT3, WNT6, WNT8A, WNT8B, DVL2, DVL3, FZD8, WNT10A, WNT10B, FZD1, FZD3, FZD2, FZD5, FZD4, FZD7, WNT2B, FZD6, WNT7B, WNT9B, WNT9A	27	151	6879	42.1818	7.40281e-38	1.48056e-38	4.44517e-36
KEGG_PATHWAY	hsa05166:HTLV-I infection	25	92.5926	4.24529e-33	WNT5A, WNT3A, WNT2, WNT1, WNT4, WNT3, WNT6, WNT8A, WNT8B, DVL2, DVL3, FZD8, WNT10A, WNT10B, FZD1, FZD3, FZD2, FZD5, FZD4, FZD7, WNT2B, FZD6, WNT7B, WNT9B, WNT9A	27	254	6879	25.0766	4.24529e-32	7.07549e-33	2.54917e-30
KEGG_PATHWAY	hsa05205:Proteoglycans in cancer	23	85.1852	6.60732e-31	WNT5A, WNT10A, FZD8, WNT10B, WNT3A, FZD1, FZD3, FZD2, FZD5, FZD4, FZD7, FZD6, WNT2B, WNT2, WNT1, WNT7B, WNT4, WNT3, WNT9B, WNT9A, WNT6, WNT8A, WNT8B	27	200	6879	29.2994	6.60732e-30	9.43903e-31	3.9675e-28
KEGG_PATHWAY	hsa05200:Pathways in cancer	25	92.5926	2.16177e-28	WNT5A, WNT3A, WNT2, WNT1, WNT4, WNT3, WNT6, WNT8A, WNT8B, DVL2, DVL3, FZD8, WNT10A, WNT10B, FZD1, FZD3, FZD2, FZD5, FZD4, FZD7, WNT2B, FZD6, WNT7B, WNT9B, WNT9A	27	393	6879	16.2072	2.16177e-27	2.70221e-28	1.29808e-25
GOTERM_MF_DIRECT	GO:0005109~frizzled binding	20	74.0741	3.2986e-48	WNT5A, DVL2, DVL3, WNT10A, WNT10B, WNT3A, FZD1, FZD7, WNT2B, WNT2, WNT1, WNT7B, WNT4, WNT3, LRP6, WNT9B, WNT9A, WNT6, WNT8A, WNT8B	27	36	16881	347.346	1.22048e-46	1.22048e-46	2.96186e-45
GOTERM_MF_DIRECT	GO:0042813~Wnt-activated receptor activity	10	37.037	5.01098e-21	FZD8, LRP6, FZD1, FZD3, FZD2, FZD5, FZD4, FZD7, LRP5, FZD6	27	22	16881	284.192	1.85406e-19	9.27032e-20	4.49944e-18
GOTERM_MF_DIRECT	GO:0017147~Wnt-protein binding	10	37.037	2.01255e-19	FZD8, LRP6, FZD1, FZD3, FZD2, FZD5, FZD4, FZD7, LRP5, FZD6	27	31	16881	201.685	7.44645e-18	2.48215e-18	1.8071e-16
GOTERM_MF_DIRECT	GO:0048018~receptor agonist activity	8	29.6296	9.62274e-17	WNT5A, WNT2, WNT1, WNT4, WNT10B, WNT3, WNT3A, WNT8A	27	16	16881	312.611	4.10783e-15	9.99201e-16	9.99201e-14
GOTERM_MF_DIRECT	GO:0030165~PDZ domain binding	6	22.2222	1.84468e-07	FZD8, FZD1, FZD3, FZD2, FZD4, FZD7	27	86	16881	43.6202	6.82529e-06	1.36506e-06	0.000165637
GOTERM_MF_DIRECT	GO:0004930~G-protein coupled receptor activity	8	29.6296	7.37825e-05	FZD8, FZD1, FZD3, FZD2, FZD5, FZD4, FZD7, FZD6	27	710	16881	7.04476	0.00272633	0.000454905	0.0662309
GOTERM_MF_DIRECT	GO:0019904~protein domain specific binding	5	18.5185	0.000270628	WNT5A, DVL2, WNT1, WNT3, WNT3A	27	208	16881	15.0294	0.00996462	0.00142963	0.242739
GOTERM_MF_DIRECT	GO:0005102~receptor binding	5	18.5185	0.00195273	FZD8, DVL3, WNT3A, LRP6, FZD1	27	353	16881	8.85584	0.0697683	0.00899946	1.73979
GOTERM_MF_DIRECT	GO:1904928~coreceptor activity involved in canonical Wnt signaling pathway	2	7.40741	0.00307811	LRP6, LRP5	27	2	16881	625.222	0.107801	0.012594	2.73018
GOTERM_MF_DIRECT	GO:0071936~coreceptor activity involved in Wnt signaling pathway	2	7.40741	0.00307811	LRP6, LRP5	27	2	16881	625.222	0.107801	0.012594	2.73018
GOTERM_MF_DIRECT	GO:0005110~frizzled-2 binding	2	7.40741	0.00307811	WNT5A, WNT3A	27	2	16881	625.222	0.107801	0.012594	2.73018
GOTERM_MF_DIRECT	GO:0019534~toxin transporter activity	2	7.40741	0.00920701	LRP6, LRP5	27	6	16881	208.407	0.28982	0.0336447	7.96986
GOTERM_MF_DIRECT	GO:0031625~ubiquitin protein ligase binding	4	14.8148	0.0094677	FZD8, FZD5, FZD4, FZD6	27	287	16881	8.7139	0.296701	0.0314911	8.18706
GOTERM_MF_DIRECT	GO:0039706~co-receptor binding	2	7.40741	0.0152997	WNT3A, WNT9B	27	10	16881	125.044	0.434736	0.0464263	12.9284
GOTERM_MF_DIRECT	GO:0005125~cytokine activity	3	11.1111	0.0298176	WNT5A, WNT2, WNT1	27	176	16881	10.6572	0.673732	0.0825494	23.8001
GOTERM_MF_DIRECT	GO:0048365~Rac GTPase binding	2	7.40741	0.0598601	DVL2, DVL3	27	40	16881	31.2611	0.898112	0.150523	42.5499
GOTERM_CC_DIRECT	GO:0005578~proteinaceous extracellular matrix	15	55.5556	1.28436e-19	WNT5A, WNT10A, WNT10B, WNT3A, WNT2B, WNT2, WNT1, WNT7B, WNT4, WNT3, WNT9B, WNT9A, WNT6, WNT8A, WNT8B	27	268	18224	37.7778	5.90804e-18	5.90804e-18	1.21395e-16
GOTERM_CC_DIRECT	GO:1990909~Wnt signalosome	6	22.2222	1.80484e-12	WNT2, DVL3, WNT3, LRP6, FZD1, LRP5	27	11	18224	368.162	8.30249e-11	4.15125e-11	1.70595e-09
GOTERM_CC_DIRECT	GO:0030666~endocytic vesicle membrane	7	25.9259	3.8887e-10	WNT5A, WNT1, WNT7B, WNT4, WNT3, WNT3A, WNT6	27	66	18224	71.587	1.7888e-08	5.96267e-09	3.67553e-07
GOTERM_CC_DIRECT	GO:0005576~extracellular region	16	59.2593	4.4269e-10	WNT5A, WNT10A, WNT10B, WNT3A, WNT2B, WNT2, WNT1, WNT7B, WNT4, WNT3, LRP6, WNT9B, WNT9A, WNT6, WNT8A, WNT8B	27	1610	18224	6.70771	2.03637e-08	5.09094e-09	4.18422e-07
GOTERM_CC_DIRECT	GO:0005615~extracellular space	15	55.5556	5.64328e-10	WNT5A, WNT10A, WNT10B, WNT3A, WNT2B, WNT2, WNT1, WNT7B, WNT4, WNT3, WNT9B, WNT9A, WNT6, WNT8A, WNT8B	27	1347	18224	7.51629	2.59591e-08	5.19182e-09	5.33392e-07
GOTERM_CC_DIRECT	GO:0009986~cell surface	11	40.7407	1.72524e-09	WNT5A, WNT1, WNT4, WNT3A, LRP6, FZD1, FZD3, WNT6, FZD5, FZD4, FZD6	27	542	18224	13.6985	7.9361e-08	1.32268e-08	1.63066e-06
GOTERM_CC_DIRECT	GO:0005796~Golgi lumen	7	25.9259	3.85699e-09	WNT5A, WNT1, WNT7B, WNT4, WNT3, WNT3A, WNT6	27	96	18224	49.216	1.77422e-07	2.53459e-08	3.64555e-06
GOTERM_CC_DIRECT	GO:1990851~Wnt-Frizzled-LRP5/6 complex	4	14.8148	1.03018e-08	FZD8, WNT3A, LRP6, LRP5	27	4	18224	674.963	4.73883e-07	5.92354e-08	9.73708e-06
GOTERM_CC_DIRECT	GO:0005788~endoplasmic reticulum lumen	7	25.9259	2.44321e-07	WNT5A, WNT1, WNT7B, WNT4, WNT3, WNT3A, WNT6	27	192	18224	24.608	1.12387e-05	1.24875e-06	0.000230927
GOTERM_CC_DIRECT	GO:0005886~plasma membrane	18	66.6667	3.76413e-06	WNT5A, DVL2, WNT3A, FZD1, FZD3, FZD2, FZD5, FZD4, FZD7, FZD6, WNT2, WNT1, WNT7B, WNT4, WNT3, LRP6, WNT6, LRP5	27	4121	18224	2.94815	0.000173135	1.73149e-05	0.00355772
GOTERM_CC_DIRECT	GO:0030669~clathrin-coated endocytic vesicle membrane	4	14.8148	2.65092e-05	WNT5A, FZD2, FZD5, FZD4	27	41	18224	65.85	0.0012187	0.000110852	0.0250532
GOTERM_CC_DIRECT	GO:0031901~early endosome membrane	3	11.1111	0.0118156	WNT3A, LRP6, FZD5	27	116	18224	17.4559	0.421175	0.0445405	10.6263
GOTERM_CC_DIRECT	GO:0070062~extracellular exosome	9	33.3333	0.0371003	WNT5A, WNT1, WNT7B, WNT4, WNT3, WNT3A, WNT9A, WNT6, FZD4	27	2811	18224	2.16103	0.824318	0.125213	30.0462
GOTERM_CC_DIRECT	GO:0016328~lateral plasma membrane	2	7.40741	0.0729769	DVL2, FZD3	27	53	18224	25.4703	0.969369	0.220405	51.1408
GOTERM_BP_DIRECT	GO:0060070~canonical Wnt signaling pathway	23	85.1852	1.29609e-48	WNT5A, DVL2, DVL3, FZD8, WNT10B, WNT3A, FZD1, FZD3, FZD2, FZD5, FZD4, FZD7, WNT2B, WNT2, WNT1, WNT7B, WNT4, WNT3, WNT9B, LRP6, WNT9A, WNT8A, LRP5	27	83	16792	172.341	6.49339e-46	6.49339e-46	1.86694e-45
GOTERM_BP_DIRECT	GO:0030182~neuron differentiation	21	77.7778	2.97055e-41	WNT5A, WNT10A, FZD8, WNT10B, WNT3A, FZD1, FZD3, FZD2, FZD5, FZD4, FZD7, WNT2B, WNT2, WNT7B, WNT4, WNT3, WNT9B, WNT9A, WNT6, WNT8A, WNT8B	27	95	16792	137.478	1.48825e-38	7.44123e-39	4.27892e-38
GOTERM_BP_DIRECT	GO:0016055~Wnt signaling pathway	20	74.0741	1.85795e-32	WNT5A, DVL2, DVL3, WNT10A, WNT10B, WNT3A, FZD4, WNT2B, WNT2, WNT1, WNT7B, WNT4, WNT3, LRP6, WNT9B, WNT9A, WNT6, WNT8A, WNT8B, LRP5	27	187	16792	66.5161	9.30832e-30	3.10277e-30	2.67627e-29
GOTERM_BP_DIRECT	GO:0045165~cell fate commitment	13	48.1481	3.49478e-25	WNT5A, WNT10A, WNT10B, WNT2B, WNT2, WNT1, WNT4, WNT7B, WNT3, WNT9B, WNT9A, WNT6, WNT8B	27	46	16792	175.762	1.75089e-22	4.37721e-23	5.03405e-22
GOTERM_BP_DIRECT	GO:1904886~beta-catenin destruction complex disassembly	11	40.7407	6.93159e-24	DVL2, DVL3, WNT1, WNT3A, LRP6, FZD1, FZD2, FZD5, WNT8A, WNT8B, LRP5	27	22	16792	310.963	3.47273e-21	6.94546e-22	9.98459e-21
GOTERM_BP_DIRECT	GO:0071300~cellular response to retinoic acid	12	44.4444	2.12172e-20	WNT5A, WNT2, WNT7B, WNT10B, WNT3, WNT3A, WNT9B, WNT9A, WNT6, FZD4, FZD7, WNT8B	27	70	16792	106.616	1.06298e-17	1.77163e-18	3.05622e-17
GOTERM_BP_DIRECT	GO:0035567~non-canonical Wnt signaling pathway	9	33.3333	2.40311e-19	WNT5A, DVL2, FZD8, DVL3, FZD1, FZD3, FZD2, FZD5, FZD6	27	17	16792	329.255	1.20396e-16	1.71994e-17	3.46154e-16
GOTERM_BP_DIRECT	GO:0060071~Wnt signaling pathway, planar cell polarity pathway	12	44.4444	5.16747e-19	WNT5A, DVL2, DVL3, WNT1, FZD1, WNT9B, FZD3, FZD2, FZD5, FZD4, FZD7, FZD6	27	92	16792	81.1208	2.5889e-16	3.23613e-17	7.44347e-16
GOTERM_BP_DIRECT	GO:0007275~multicellular organism development	15	55.5556	4.42659e-15	WNT5A, WNT10A, WNT10B, FZD2, FZD4, FZD6, WNT2B, WNT2, WNT1, WNT7B, WNT4, WNT9B, WNT9A, WNT6, WNT8A	27	521	16792	17.9057	2.22489e-12	2.47247e-13	6.39488e-12
GOTERM_BP_DIRECT	GO:0051091~positive regulation of sequence-specific DNA binding transcription factor activity	10	37.037	2.95099e-14	DVL2, WNT2, WNT1, WNT10B, WNT3A, LRP6, FZD1, FZD2, FZD4, LRP5	27	105	16792	59.231	1.47955e-11	1.47959e-12	4.25437e-11
GOTERM_BP_DIRECT	GO:0045893~positive regulation of transcription, DNA-templated	13	48.1481	3.98551e-12	DVL2, WNT5A, DVL3, WNT1, WNT4, WNT3A, LRP6, FZD1, FZD2, WNT6, FZD4, FZD7, LRP5	27	515	16792	15.6991	1.99672e-09	1.8152e-10	5.74086e-09
GOTERM_BP_DIRECT	GO:1904953~Wnt signaling pathway involved in midbrain dopaminergic neuron differentiation	5	18.5185	6.75737e-11	WNT5A, WNT1, WNT3A, LRP6, FZD1	27	6	16792	518.272	3.38544e-08	2.8212e-09	9.73363e-08
GOTERM_BP_DIRECT	GO:0033278~cell proliferation in midbrain	5	18.5185	6.75737e-11	WNT2, WNT1, WNT3A, FZD3, FZD6	27	6	16792	518.272	3.38544e-08	2.8212e-09	9.73363e-08
GOTERM_BP_DIRECT	GO:0090263~positive regulation of canonical Wnt signaling pathway	8	29.6296	4.68861e-10	DVL2, WNT2, WNT1, WNT4, WNT10B, WNT3A, LRP6, WNT2B	27	120	16792	41.4617	2.34899e-07	1.80692e-08	6.75369e-07
GOTERM_BP_DIRECT	GO:0090179~planar cell polarity pathway involved in neural tube closure	5	18.5185	2.21594e-09	WNT5A, DVL2, DVL3, FZD1, FZD2	27	12	16792	259.136	1.11019e-06	7.92991e-08	3.19195e-06
GOTERM_BP_DIRECT	GO:0007223~Wnt signaling pathway, calcium modulating pathway	6	22.2222	3.28741e-09	WNT5A, FZD3, FZD2, FZD5, FZD4, FZD6	27	39	16792	95.6809	1.64699e-06	1.098e-07	4.73534e-06
GOTERM_BP_DIRECT	GO:0043507~positive regulation of JUN kinase activity	5	18.5185	1.38078e-07	DVL2, FZD8, DVL3, FZD5, FZD4	27	31	16792	100.311	6.91748e-05	4.32357e-06	0.000198894
GOTERM_BP_DIRECT	GO:0090090~negative regulation of canonical Wnt signaling pathway	7	25.9259	1.49555e-07	WNT5A, DVL2, DVL3, WNT4, LRP6, FZD1, FZD6	27	163	16792	26.7085	7.49245e-05	4.40748e-06	0.000215426
GOTERM_BP_DIRECT	GO:0061180~mammary gland epithelium development	4	14.8148	1.83591e-07	WNT2, WNT7B, WNT4, WNT3	27	8	16792	310.963	9.19747e-05	5.10993e-06	0.000264452
GOTERM_BP_DIRECT	GO:0061303~cornea development in camera-type eye	4	14.8148	1.83591e-07	WNT9B, WNT9A, WNT6, WNT2B	27	8	16792	310.963	9.19747e-05	5.10993e-06	0.000264452
GOTERM_BP_DIRECT	GO:0071425~hematopoietic stem cell proliferation	4	14.8148	1.186e-06	WNT5A, WNT1, WNT10B, WNT2B	27	14	16792	177.693	0.000594011	3.12726e-05	0.00170836
GOTERM_BP_DIRECT	GO:0090103~cochlea morphogenesis	4	14.8148	4.97662e-06	WNT5A, DVL2, DVL3, FZD2	27	22	16792	113.077	0.00249019	0.000124657	0.00716832
GOTERM_BP_DIRECT	GO:0060021~palate development	5	18.5185	5.37045e-06	WNT5A, WNT3A, LRP6, WNT9B, WNT8A	27	76	16792	40.9162	0.00268699	0.000128116	0.00773557
GOTERM_BP_DIRECT	GO:0061184~positive regulation of dermatome development	3	11.1111	6.90942e-06	WNT1, WNT4, WNT3A	27	3	16792	621.926	0.00345565	0.000157334	0.00995219
GOTERM_BP_DIRECT	GO:0033077~T cell differentiation in thymus	4	14.8148	9.40391e-06	FZD8, WNT1, FZD5, FZD7	27	27	16792	92.1372	0.0047003	0.000204822	0.013545
GOTERM_BP_DIRECT	GO:1904954~canonical Wnt signaling pathway involved in midbrain dopaminergic neuron differentiation	3	11.1111	1.38057e-05	WNT2, WNT1, WNT3	27	4	16792	466.444	0.00689282	0.000288154	0.0198845
GOTERM_BP_DIRECT	GO:0038031~non-canonical Wnt signaling pathway via JNK cascade	3	11.1111	2.29875e-05	WNT5A, DVL3, FZD7	27	5	16792	373.156	0.0114508	0.000460569	0.0331072
GOTERM_BP_DIRECT	GO:0044332~Wnt signaling pathway involved in dorsal/ventral axis specification	3	11.1111	2.29875e-05	LRP6, FZD5, LRP5	27	5	16792	373.156	0.0114508	0.000460569	0.0331072
GOTERM_BP_DIRECT	GO:0001658~branching involved in ureteric bud morphogenesis	4	14.8148	3.6344e-05	WNT1, WNT4, WNT9B, WNT6	27	42	16792	59.231	0.0180439	0.000700088	0.0523388
GOTERM_BP_DIRECT	GO:0045599~negative regulation of fat cell differentiation	4	14.8148	3.6344e-05	WNT5A, WNT1, WNT10B, WNT3A	27	42	16792	59.231	0.0180439	0.000700088	0.0523388
GOTERM_BP_DIRECT	GO:0001934~positive regulation of protein phosphorylation	5	18.5185	4.10056e-05	DVL2, DVL3, WNT1, WNT3A, FZD1	27	127	16792	24.4853	0.0203346	0.000760608	0.0590502
GOTERM_BP_DIRECT	GO:0071560~cellular response to transforming growth factor beta stimulus	4	14.8148	5.79098e-05	WNT5A, WNT2, WNT10A, WNT4	27	49	16792	50.7695	0.0285968	0.00103567	0.0833836
GOTERM_BP_DIRECT	GO:1904948~midbrain dopaminergic neuron differentiation	3	11.1111	6.41813e-05	WNT2, LRP6, WNT9B	27	8	16792	233.222	0.0316444	0.00110821	0.0924099
GOTERM_BP_DIRECT	GO:0042472~inner ear morphogenesis	4	14.8148	6.92504e-05	WNT1, WNT3A, FZD3, FZD6	27	52	16792	47.8405	0.0341007	0.00115585	0.0997052
GOTERM_BP_DIRECT	GO:0061072~iris morphogenesis	3	11.1111	0.000102952	WNT2, WNT9A, WNT2B	27	10	16792	186.578	0.0502739	0.00166254	0.148195
GOTERM_BP_DIRECT	GO:0007416~synapse assembly	4	14.8148	0.000111737	WNT5A, WNT3A, FZD1, FZD5	27	61	16792	40.782	0.0544453	0.00174796	0.160831
GOTERM_BP_DIRECT	GO:0010812~negative regulation of cell-substrate adhesion	3	11.1111	0.0002074	WNT1, FZD4, FZD7	27	14	16792	133.27	0.098701	0.00314409	0.298334
GOTERM_BP_DIRECT	GO:0001843~neural tube closure	4	14.8148	0.000223408	DVL2, LRP6, FZD3, FZD6	27	77	16792	32.3078	0.105902	0.00328693	0.321325
GOTERM_BP_DIRECT	GO:0001736~establishment of planar polarity	3	11.1111	0.000272974	WNT5A, FZD3, FZD6	27	16	16792	116.611	0.127837	0.00390034	0.392486
GOTERM_BP_DIRECT	GO:0007186~G-protein coupled receptor signaling pathway	8	29.6296	0.000330306	FZD8, FZD1, FZD3, FZD2, FZD5, FZD4, FZD7, FZD6	27	899	16792	5.53438	0.152539	0.00458697	0.474736
GOTERM_BP_DIRECT	GO:0036342~post-anal tail morphogenesis	3	11.1111	0.00034738	WNT5A, WNT3A, FZD3	27	18	16792	103.654	0.15976	0.00469348	0.499219
GOTERM_BP_DIRECT	GO:0045944~positive regulation of transcription from RNA polymerase II promoter	8	29.6296	0.0005606	WNT5A, WNT2, FZD8, WNT1, WNT3A, LRP6, FZD5, LRP5	27	981	16792	5.07177	0.244926	0.00736588	0.804488
GOTERM_BP_DIRECT	GO:0007267~cell-cell signaling	5	18.5185	0.00058812	WNT2, WNT1, FZD1, WNT9B, WNT9A	27	254	16792	12.2426	0.255271	0.00752882	0.843824
GOTERM_BP_DIRECT	GO:0048843~negative regulation of axon extension involved in axon guidance	3	11.1111	0.0007323	WNT5A, WNT3, WNT3A	27	26	16792	71.7607	0.307202	0.00913345	1.04968
GOTERM_BP_DIRECT	GO:0002053~positive regulation of mesenchymal cell proliferation	3	11.1111	0.0007323	WNT5A, WNT2, LRP5	27	26	16792	71.7607	0.307202	0.00913345	1.04968
GOTERM_BP_DIRECT	GO:0002088~lens development in camera-type eye	3	11.1111	0.00118181	WNT5A, WNT2, WNT2B	27	33	16792	56.5387	0.447021	0.0143458	1.68891
GOTERM_BP_DIRECT	GO:0001942~hair follicle development	3	11.1111	0.00156604	WNT10A, FZD3, FZD6	27	38	16792	49.0994	0.543972	0.0185216	2.23227
GOTERM_BP_DIRECT	GO:0032526~response to retinoic acid	3	11.1111	0.00182147	WNT9B, WNT8A, WNT8B	27	41	16792	45.5068	0.598838	0.0210176	2.59195
GOTERM_BP_DIRECT	GO:0034613~cellular protein localization	3	11.1111	0.00200203	WNT5A, DVL2, WNT3A	27	43	16792	43.3902	0.633598	0.0225604	2.84544
GOTERM_BP_DIRECT	GO:0030514~negative regulation of BMP signaling pathway	3	11.1111	0.00219075	WNT5A, WNT1, FZD1	27	45	16792	41.4617	0.666719	0.0241214	3.10974
GOTERM_BP_DIRECT	GO:0003151~outflow tract morphogenesis	3	11.1111	0.00228816	DVL2, FZD1, FZD2	27	46	16792	40.5604	0.682628	0.0246409	3.24589
GOTERM_BP_DIRECT	GO:0009267~cellular response to starvation	3	11.1111	0.00238758	WNT4, WNT9B, WNT2B	27	47	16792	39.6974	0.698085	0.0251591	3.38469
GOTERM_BP_DIRECT	GO:0044340~canonical Wnt signaling pathway involved in regulation of cell proliferation	2	7.40741	0.00309441	DVL2, LRP6	27	2	16792	621.926	0.788325	0.0318304	4.36606
GOTERM_BP_DIRECT	GO:0060061~Spemann organizer formation	2	7.40741	0.00309441	WNT1, FZD5	27	2	16792	621.926	0.788325	0.0318304	4.36606
GOTERM_BP_DIRECT	GO:0072174~metanephric tubule formation	2	7.40741	0.00309441	WNT4, WNT9B	27	2	16792	621.926	0.788325	0.0318304	4.36606
GOTERM_BP_DIRECT	GO:0044335~canonical Wnt signaling pathway involved in neural crest cell differentiation	2	7.40741	0.00309441	LRP6, WNT8A	27	2	16792	621.926	0.788325	0.0318304	4.36606
GOTERM_BP_DIRECT	GO:0048697~positive regulation of collateral sprouting in absence of injury	2	7.40741	0.00309441	WNT3, WNT3A	27	2	16792	621.926	0.788325	0.0318304	4.36606
GOTERM_BP_DIRECT	GO:0061317~canonical Wnt signaling pathway involved in cardiac muscle cell fate commitment	2	7.40741	0.00309441	WNT3A, WNT8A	27	2	16792	621.926	0.788325	0.0318304	4.36606
GOTERM_BP_DIRECT	GO:0044338~canonical Wnt signaling pathway involved in mesenchymal stem cell differentiation	2	7.40741	0.00309441	WNT3, FZD1	27	2	16792	621.926	0.788325	0.0318304	4.36606
GOTERM_BP_DIRECT	GO:0030825~positive regulation of cGMP metabolic process	2	7.40741	0.00309441	WNT5A, FZD2	27	2	16792	621.926	0.788325	0.0318304	4.36606
GOTERM_BP_DIRECT	GO:0048146~positive regulation of fibroblast proliferation	3	11.1111	0.00313967	WNT5A, WNT2, WNT1	27	54	16792	34.5514	0.793086	0.0316407	4.42859
GOTERM_BP_DIRECT	GO:0045669~positive regulation of osteoblast differentiation	3	11.1111	0.00386139	WNT7B, WNT4, WNT10B	27	60	16792	31.0963	0.856052	0.0380243	5.42045
GOTERM_BP_DIRECT	GO:0060492~lung induction	2	7.40741	0.00463816	WNT2, WNT2B	27	3	16792	414.617	0.902619	0.0446419	6.47726
GOTERM_BP_DIRECT	GO:1904693~midbrain morphogenesis	2	7.40741	0.00463816	FZD3, FZD6	27	3	16792	414.617	0.902619	0.0446419	6.47726
GOTERM_BP_DIRECT	GO:0090245~axis elongation involved in somitogenesis	2	7.40741	0.00463816	WNT3A, LRP6	27	3	16792	414.617	0.902619	0.0446419	6.47726
GOTERM_BP_DIRECT	GO:0060638~mesenchymal-epithelial cell signaling	2	7.40741	0.00463816	WNT5A, WNT2B	27	3	16792	414.617	0.902619	0.0446419	6.47726
GOTERM_BP_DIRECT	GO:0044339~canonical Wnt signaling pathway involved in osteoblast differentiation	2	7.40741	0.00463816	WNT3, FZD1	27	3	16792	414.617	0.902619	0.0446419	6.47726
GOTERM_BP_DIRECT	GO:0008284~positive regulation of cell proliferation	5	18.5185	0.00539143	WNT2, WNT1, WNT10B, WNT3A, LRP5	27	466	16792	6.67302	0.933358	0.0507518	7.49161
GOTERM_BP_DIRECT	GO:0030324~lung development	3	11.1111	0.00612384	WNT5A, WNT2, WNT7B	27	76	16792	24.5497	0.953925	0.0564119	8.46802
GOTERM_BP_DIRECT	GO:0061304~retinal blood vessel morphogenesis	2	7.40741	0.00617961	FZD4, LRP5	27	4	16792	310.963	0.955202	0.0558884	8.54198
GOTERM_BP_DIRECT	GO:0021871~forebrain regionalization	2	7.40741	0.00617961	WNT7B, WNT2B	27	4	16792	310.963	0.955202	0.0558884	8.54198
GOTERM_BP_DIRECT	GO:0060535~trachea cartilage morphogenesis	2	7.40741	0.00617961	WNT7B, LRP6	27	4	16792	310.963	0.955202	0.0558884	8.54198
GOTERM_BP_DIRECT	GO:0035426~extracellular matrix-cell signaling	2	7.40741	0.00617961	FZD4, LRP5	27	4	16792	310.963	0.955202	0.0558884	8.54198
GOTERM_BP_DIRECT	GO:0010628~positive regulation of gene expression	4	14.8148	0.00748819	WNT10A, WNT3, WNT3A, WNT6	27	262	16792	9.49505	0.976849	0.0661759	10.2614
GOTERM_BP_DIRECT	GO:1904938~planar cell polarity pathway involved in axon guidance	2	7.40741	0.00771876	WNT5A, FZD3	27	5	16792	248.77	0.979393	0.066975	10.5612
GOTERM_BP_DIRECT	GO:0045836~positive regulation of meiotic nuclear division	2	7.40741	0.00771876	WNT5A, WNT4	27	5	16792	248.77	0.979393	0.066975	10.5612
GOTERM_BP_DIRECT	GO:0008584~male gonad development	3	11.1111	0.00923323	WNT5A, WNT4, WNT2B	27	94	16792	19.8487	0.990413	0.078297	12.5075
GOTERM_BP_DIRECT	GO:0014033~neural crest cell differentiation	2	7.40741	0.00925562	WNT10A, LRP6	27	6	16792	207.309	0.990521	0.0771806	12.536
GOTERM_BP_DIRECT	GO:0060022~hard palate development	2	7.40741	0.00925562	FZD1, FZD2	27	6	16792	207.309	0.990521	0.0771806	12.536
GOTERM_BP_DIRECT	GO:0003150~muscular septum morphogenesis	2	7.40741	0.00925562	FZD1, FZD2	27	6	16792	207.309	0.990521	0.0771806	12.536
GOTERM_BP_DIRECT	GO:2000049~positive regulation of cell-cell adhesion mediated by cadherin	2	7.40741	0.0107902	WNT5A, WNT3A	27	7	16792	177.693	0.99564	0.0880072	14.4673
GOTERM_BP_DIRECT	GO:0008595~anterior/posterior axis specification, embryo	2	7.40741	0.0107902	WNT5A, FZD5	27	7	16792	177.693	0.99564	0.0880072	14.4673
GOTERM_BP_DIRECT	GO:0000578~embryonic axis specification	2	7.40741	0.0107902	WNT1, FZD5	27	7	16792	177.693	0.99564	0.0880072	14.4673
GOTERM_BP_DIRECT	GO:0072089~stem cell proliferation	2	7.40741	0.0123225	WNT7B, WNT3	27	8	16792	155.481	0.997995	0.0983528	16.3561
GOTERM_BP_DIRECT	GO:0060231~mesenchymal to epithelial transition	2	7.40741	0.0123225	WNT4, FZD7	27	8	16792	155.481	0.997995	0.0983528	16.3561
GOTERM_BP_DIRECT	GO:1903827~regulation of cellular protein localization	2	7.40741	0.0138525	WNT5A, DVL3	27	9	16792	138.206	0.999078	0.108248	18.2032
GOTERM_BP_DIRECT	GO:0003149~membranous septum morphogenesis	2	7.40741	0.0153802	FZD1, FZD2	27	10	16792	124.385	0.999576	0.117722	20.0097
GOTERM_BP_DIRECT	GO:0090009~primitive streak formation	2	7.40741	0.0153802	WNT5A, LRP6	27	10	16792	124.385	0.999576	0.117722	20.0097
GOTERM_BP_DIRECT	GO:0040037~negative regulation of fibroblast growth factor receptor signaling pathway	2	7.40741	0.0153802	WNT5A, WNT4	27	10	16792	124.385	0.999576	0.117722	20.0097
GOTERM_BP_DIRECT	GO:0021527~spinal cord association neuron differentiation	2	7.40741	0.0199498	WNT1, WNT3A	27	13	16792	95.6809	0.999959	0.148071	25.1939
GOTERM_BP_DIRECT	GO:0007411~axon guidance	3	11.1111	0.0249541	WNT5A, WNT3, WNT3A	27	159	16792	11.7345	0.999997	0.179484	30.5116
GOTERM_BP_DIRECT	GO:0071901~negative regulation of protein serine/threonine kinase activity	2	7.40741	0.0275204	LRP6, LRP5	27	18	16792	69.1029	0.999999	0.193533	33.1001
GOTERM_BP_DIRECT	GO:0060716~labyrinthine layer blood vessel development	2	7.40741	0.0290277	WNT2, FZD5	27	19	16792	65.4659	1	0.200372	34.5784
GOTERM_BP_DIRECT	GO:0060828~regulation of canonical Wnt signaling pathway	2	7.40741	0.0305328	FZD5, LRP5	27	20	16792	62.1926	1	0.206952	36.0241
GOTERM_BP_DIRECT	GO:0001701~in utero embryonic development	3	11.1111	0.0336514	WNT7B, WNT3A, WNT9B	27	187	16792	9.97742	1	0.22291	38.9254
GOTERM_BP_DIRECT	GO:0061098~positive regulation of protein tyrosine kinase activity	2	7.40741	0.0395165	DVL2, WNT3A	27	26	16792	47.8405	1	0.253789	44.0531
GOTERM_BP_DIRECT	GO:0035115~embryonic forelimb morphogenesis	2	7.40741	0.0484201	WNT3, WNT9A	27	32	16792	38.8704	1	0.298981	51.0767
GOTERM_BP_DIRECT	GO:0001837~epithelial to mesenchymal transition	2	7.40741	0.0513703	WNT5A, WNT4	27	34	16792	36.5839	1	0.310734	53.2168
GOTERM_BP_DIRECT	GO:0030501~positive regulation of bone mineralization	2	7.40741	0.0528421	WNT4, WNT10B	27	35	16792	35.5386	1	0.314608	54.2515
GOTERM_BP_DIRECT	GO:0030177~positive regulation of Wnt signaling pathway	2	7.40741	0.0543117	WNT3, FZD4	27	36	16792	34.5514	1	0.318355	55.2634
GOTERM_BP_DIRECT	GO:0007257~activation of JUN kinase activity	2	7.40741	0.0572444	WNT5A, WNT7B	27	38	16792	32.7329	1	0.329073	57.2207
GOTERM_BP_DIRECT	GO:0034446~substrate adhesion-dependent cell spreading	2	7.40741	0.0572444	FZD4, FZD7	27	38	16792	32.7329	1	0.329073	57.2207
GOTERM_BP_DIRECT	GO:0002062~chondrocyte differentiation	2	7.40741	0.0587074	WNT10B, WNT2B	27	39	16792	31.8936	1	0.332455	58.1671
GOTERM_BP_DIRECT	GO:0043434~response to peptide hormone	2	7.40741	0.0659899	LRP6, LRP5	27	44	16792	28.2694	1	0.362391	62.5949
GOTERM_BP_DIRECT	GO:0032729~positive regulation of interferon-gamma production	2	7.40741	0.0688877	WNT5A, FZD5	27	46	16792	27.0403	1	0.37149	64.2322
GOTERM_BP_DIRECT	GO:0042493~response to drug	3	11.1111	0.0798845	DVL3, FZD1, FZD3	27	304	16792	6.13743	1	0.41419	69.8583
GOTERM_BP_DIRECT	GO:0042475~odontogenesis of dentin-containing tooth	2	7.40741	0.0818211	LRP6, WNT6	27	55	16792	22.6155	1	0.41804	70.7593
GOTERM_BP_DIRECT	GO:0050680~negative regulation of epithelial cell proliferation	2	7.40741	0.0832474	WNT5A, WNT10B	27	56	16792	22.2116	1	0.419765	71.4068
GOTERM_BP_DIRECT	GO:0042733~embryonic digit morphogenesis	2	7.40741	0.0832474	WNT5A, LRP5	27	56	16792	22.2116	1	0.419765	71.4068
GOTERM_BP_DIRECT	GO:0032092~positive regulation of protein binding	2	7.40741	0.0903472	WNT5A, WNT3A	27	61	16792	20.391	1	0.443278	74.4362
GOTERM_BP_DIRECT	GO:0001947~heart looping	2	7.40741	0.0903472	WNT5A, WNT3A	27	61	16792	20.391	1	0.443278	74.4362
GOTERM_BP_DIRECT	GO:0000902~cell morphogenesis	2	7.40741	0.0917609	WNT3, WNT8A	27	62	16792	20.0621	1	0.44459	75.0025

## Sheet: mTOR-C图
Category	Term	Count	%	PValue	Genes	List Total	Pop Hits	Pop Total	Fold Enrichment	Bonferroni	Benjamini	FDR
KEGG_PATHWAY	hsa04150:mTOR signaling pathway	16	72.7273	1.62395e-28	PIK3CB, RPS6KB2, RPS6KB1, RICTOR, RPTOR, MAPK1, AKT1S1, EIF4E, TSC1, INS, TSC2, RHEB, MLST8, AKT3, PIK3R1, AKT2	21	58	6879	90.3645	1.88378e-26	1.88378e-26	1.85274e-25
KEGG_PATHWAY	hsa04910:Insulin signaling pathway	16	72.7273	2.24101e-22	MAP2K1, PIK3CB, RPS6KB2, RPS6KB1, RPTOR, MAPK1, KRAS, EIF4E, TSC1, INS, GSK3B, TSC2, RHEB, AKT3, PIK3R1, AKT2	21	138	6879	37.9793	2.59958e-20	1.29979e-20	2.55673e-19
KEGG_PATHWAY	hsa04151:PI3K-Akt signaling pathway	19	86.3636	4.52218e-22	SGK1, MAP2K1, PIK3CB, RPS6KB2, RPS6KB1, RPTOR, IGF1R, MAPK1, KRAS, EIF4E, TSC1, INS, GSK3B, TSC2, RHEB, MLST8, AKT3, PIK3R1, AKT2	21	345	6879	18.0402	5.24573e-20	1.74858e-20	5.15928e-19
KEGG_PATHWAY	hsa04152:AMPK signaling pathway	13	59.0909	6.84995e-17	IGF1R, AKT1S1, TSC1, PIK3CB, INS, TSC2, RPS6KB2, RHEB, RPS6KB1, AKT3, PIK3R1, RPTOR, AKT2	21	123	6879	34.6214	1.28786e-14	3.21965e-15	1.22125e-13
KEGG_PATHWAY	hsa05231:Choline metabolism in cancer	12	54.5455	5.84389e-16	MAPK1, KRAS, TSC1, MAP2K1, PIK3CB, TSC2, RPS6KB2, RHEB, RPS6KB1, AKT3, PIK3R1, AKT2	21	101	6879	38.9194	6.43929e-14	1.28786e-14	6.32827e-13
KEGG_PATHWAY	hsa04066:HIF-1 signaling pathway	11	50	2.86147e-14	MAPK1, IGF1R, EIF4E, MAP2K1, PIK3CB, INS, RPS6KB2, RPS6KB1, AKT3, PIK3R1, AKT2	21	96	6879	37.5342	3.32268e-12	5.53779e-13	3.26739e-11
KEGG_PATHWAY	hsa04012:ErbB signaling pathway	10	45.4545	8.138e-13	MAPK1, KRAS, MAP2K1, PIK3CB, GSK3B, RPS6KB2, RPS6KB1, AKT3, PIK3R1, AKT2	21	87	6879	37.6519	9.44e-11	1.34858e-11	9.28446e-10
KEGG_PATHWAY	hsa05215:Prostate cancer	10	45.4545	9.05106e-13	MAPK1, IGF1R, KRAS, MAP2K1, PIK3CB, INS, GSK3B, AKT3, PIK3R1, AKT2	21	88	6879	37.224	1.04986e-10	1.31233e-11	1.03256e-09
KEGG_PATHWAY	hsa05221:Acute myeloid leukemia	9	40.9091	1.34064e-12	MAPK1, KRAS, MAP2K1, PIK3CB, RPS6KB2, RPS6KB1, AKT3, PIK3R1, AKT2	21	56	6879	52.6454	1.55509e-10	1.72787e-11	1.52947e-09
KEGG_PATHWAY	hsa04917:Prolactin signaling pathway	9	40.9091	9.8085e-12	MAPK1, KRAS, MAP2K1, PIK3CB, INS, GSK3B, AKT3, PIK3R1, AKT2	21	71	6879	41.5231	1.13778e-09	1.13778e-10	1.11903e-08
KEGG_PATHWAY	hsa04919:Thyroid hormone signaling pathway	10	45.4545	1.07103e-11	MAPK1, KRAS, MAP2K1, PIK3CB, GSK3B, TSC2, RHEB, AKT3, PIK3R1, AKT2	21	115	6879	28.4845	1.24238e-09	1.12944e-10	1.22191e-08
KEGG_PATHWAY	hsa04068:FoxO signaling pathway	10	45.4545	4.32124e-11	MAPK1, IGF1R, SGK1, KRAS, MAP2K1, PIK3CB, INS, AKT3, PIK3R1, AKT2	21	134	6879	24.4456	5.01264e-09	4.1772e-10	4.93003e-08
KEGG_PATHWAY	hsa04914:Progesterone-mediated oocyte maturation	9	40.9091	5.25387e-11	MAPK1, IGF1R, KRAS, MAP2K1, PIK3CB, INS, AKT3, PIK3R1, AKT2	21	87	6879	33.8867	6.0945e-09	4.68807e-10	5.99406e-08
KEGG_PATHWAY	hsa05213:Endometrial cancer	8	36.3636	6.67497e-11	MAPK1, KRAS, MAP2K1, PIK3CB, GSK3B, AKT3, PIK3R1, AKT2	21	52	6879	50.3956	7.74297e-09	5.53069e-10	7.61536e-08
KEGG_PATHWAY	hsa05210:Colorectal cancer	8	36.3636	2.41322e-10	MAPK1, KRAS, MAP2K1, PIK3CB, GSK3B, AKT3, PIK3R1, AKT2	21	62	6879	42.2673	2.79934e-08	1.86623e-09	2.7532e-07
KEGG_PATHWAY	hsa05214:Glioma	8	36.3636	3.39914e-10	MAPK1, IGF1R, KRAS, MAP2K1, PIK3CB, AKT3, PIK3R1, AKT2	21	65	6879	40.3165	3.94301e-08	2.46438e-09	3.87802e-07
KEGG_PATHWAY	hsa04662:B cell receptor signaling pathway	8	36.3636	5.2327e-10	MAPK1, KRAS, MAP2K1, PIK3CB, GSK3B, AKT3, PIK3R1, AKT2	21	69	6879	37.9793	6.06993e-08	3.57055e-09	5.9699e-07
KEGG_PATHWAY	hsa05218:Melanoma	8	36.3636	6.42856e-10	MAPK1, IGF1R, KRAS, MAP2K1, PIK3CB, AKT3, PIK3R1, AKT2	21	71	6879	36.9095	7.45713e-08	4.14285e-09	7.33423e-07
KEGG_PATHWAY	hsa05205:Proteoglycans in cancer	10	45.4545	1.58031e-09	MAPK1, IGF1R, KRAS, MAP2K1, PIK3CB, RPS6KB2, RPS6KB1, AKT3, PIK3R1, AKT2	21	200	6879	16.3786	1.83315e-07	9.64818e-09	1.80294e-06
KEGG_PATHWAY	hsa04666:Fc gamma R-mediated phagocytosis	8	36.3636	2.14247e-09	MAPK1, MAP2K1, PIK3CB, RPS6KB2, RPS6KB1, AKT3, PIK3R1, AKT2	21	84	6879	31.1973	2.48526e-07	1.24263e-08	2.4443e-06
KEGG_PATHWAY	hsa04550:Signaling pathways regulating pluripotency of stem cells	9	40.9091	2.46993e-09	MAPK1, IGF1R, KRAS, MAP2K1, PIK3CB, GSK3B, AKT3, PIK3R1, AKT2	21	140	6879	21.0582	2.86512e-07	1.36434e-08	2.8179e-06
KEGG_PATHWAY	hsa04660:T cell receptor signaling pathway	8	36.3636	7.37208e-09	MAPK1, KRAS, MAP2K1, PIK3CB, GSK3B, AKT3, PIK3R1, AKT2	21	100	6879	26.2057	8.5516e-07	3.88709e-08	8.41067e-06
KEGG_PATHWAY	hsa05223:Non-small cell lung cancer	7	31.8182	7.85131e-09	MAPK1, KRAS, MAP2K1, PIK3CB, AKT3, PIK3R1, AKT2	21	56	6879	40.9464	9.10752e-07	3.95979e-08	8.95743e-06
KEGG_PATHWAY	hsa04931:Insulin resistance	8	36.3636	1.26705e-08	PIK3CB, INS, GSK3B, RPS6KB2, RPS6KB1, AKT3, PIK3R1, AKT2	21	108	6879	24.2646	1.46978e-06	6.12408e-08	1.44556e-05
KEGG_PATHWAY	hsa04370:VEGF signaling pathway	7	31.8182	1.33094e-08	MAPK1, KRAS, MAP2K1, PIK3CB, AKT3, PIK3R1, AKT2	21	61	6879	37.5902	1.54389e-06	6.17558e-08	1.51845e-05
KEGG_PATHWAY	hsa05230:Central carbon metabolism in cancer	7	31.8182	1.78769e-08	MAPK1, KRAS, MAP2K1, PIK3CB, AKT3, PIK3R1, AKT2	21	64	6879	35.8281	2.07372e-06	7.97586e-08	2.03955e-05
KEGG_PATHWAY	hsa05212:Pancreatic cancer	7	31.8182	1.96604e-08	MAPK1, KRAS, MAP2K1, PIK3CB, AKT3, PIK3R1, AKT2	21	65	6879	35.2769	2.2806e-06	8.44667e-08	2.24302e-05
KEGG_PATHWAY	hsa05211:Renal cell carcinoma	7	31.8182	2.15884e-08	MAPK1, KRAS, MAP2K1, PIK3CB, AKT3, PIK3R1, AKT2	21	66	6879	34.7424	2.50425e-06	8.94378e-08	2.46299e-05
KEGG_PATHWAY	hsa04664:Fc epsilon RI signaling pathway	7	31.8182	2.59153e-08	MAPK1, KRAS, MAP2K1, PIK3CB, AKT3, PIK3R1, AKT2	21	68	6879	33.7206	3.00618e-06	1.03661e-07	2.95664e-05
KEGG_PATHWAY	hsa04722:Neurotrophin signaling pathway	8	36.3636	2.64941e-08	MAPK1, KRAS, MAP2K1, PIK3CB, GSK3B, AKT3, PIK3R1, AKT2	21	120	6879	21.8381	3.07331e-06	1.02444e-07	3.02266e-05
KEGG_PATHWAY	hsa05220:Chronic myeloid leukemia	7	31.8182	3.67336e-08	MAPK1, KRAS, MAP2K1, PIK3CB, AKT3, PIK3R1, AKT2	21	72	6879	31.8472	4.26109e-06	1.37455e-07	4.19088e-05
KEGG_PATHWAY	hsa04015:Rap1 signaling pathway	9	40.9091	6.06933e-08	MAPK1, IGF1R, KRAS, MAP2K1, PIK3CB, INS, AKT3, PIK3R1, AKT2	21	210	6879	14.0388	7.04039e-06	2.20013e-07	6.92439e-05
KEGG_PATHWAY	hsa04960:Aldosterone-regulated sodium reabsorption	6	27.2727	6.54578e-08	MAPK1, SGK1, KRAS, PIK3CB, INS, PIK3R1	21	39	6879	50.3956	7.59308e-06	2.30094e-07	7.46797e-05
KEGG_PATHWAY	hsa04014:Ras signaling pathway	9	40.9091	1.07497e-07	MAPK1, IGF1R, KRAS, MAP2K1, PIK3CB, INS, AKT3, PIK3R1, AKT2	21	226	6879	13.0449	1.24696e-05	3.66756e-07	0.000122642
KEGG_PATHWAY	hsa04915:Estrogen signaling pathway	7	31.8182	2.51223e-07	MAPK1, KRAS, MAP2K1, PIK3CB, AKT3, PIK3R1, AKT2	21	99	6879	23.1616	2.91415e-05	8.32626e-07	0.000286616
KEGG_PATHWAY	hsa04725:Cholinergic synapse	7	31.8182	4.97017e-07	MAPK1, KRAS, MAP2K1, PIK3CB, AKT3, PIK3R1, AKT2	21	111	6879	20.6577	5.76524e-05	1.6015e-06	0.000567037
KEGG_PATHWAY	hsa04062:Chemokine signaling pathway	8	36.3636	5.43334e-07	MAPK1, KRAS, MAP2K1, PIK3CB, GSK3B, AKT3, PIK3R1, AKT2	21	186	6879	14.0891	6.30248e-05	1.70343e-06	0.000619879
KEGG_PATHWAY	hsa04071:Sphingolipid signaling pathway	7	31.8182	7.89169e-07	MAPK1, KRAS, MAP2K1, PIK3CB, AKT3, PIK3R1, AKT2	21	120	6879	19.1083	9.15394e-05	2.40904e-06	0.000900346
KEGG_PATHWAY	hsa04510:Focal adhesion	8	36.3636	1.08579e-06	MAPK1, IGF1R, MAP2K1, PIK3CB, GSK3B, AKT3, PIK3R1, AKT2	21	206	6879	12.7212	0.000125943	3.22952e-06	0.00123875
KEGG_PATHWAY	hsa05160:Hepatitis C	7	31.8182	1.44772e-06	MAPK1, KRAS, PIK3CB, GSK3B, AKT3, PIK3R1, AKT2	21	133	6879	17.2406	0.000167922	4.19838e-06	0.00165167
KEGG_PATHWAY	hsa05161:Hepatitis B	7	31.8182	2.40287e-06	MAPK1, KRAS, MAP2K1, PIK3CB, AKT3, PIK3R1, AKT2	21	145	6879	15.8138	0.000278694	6.79835e-06	0.00274136
KEGG_PATHWAY	hsa05164:Influenza A	7	31.8182	6.93697e-06	MAPK1, MAP2K1, PIK3CB, GSK3B, AKT3, PIK3R1, AKT2	21	174	6879	13.1782	0.000804368	1.91591e-05	0.00791399
KEGG_PATHWAY	hsa05200:Pathways in cancer	9	40.9091	7.25095e-06	MAPK1, IGF1R, KRAS, MAP2K1, PIK3CB, GSK3B, AKT3, PIK3R1, AKT2	21	393	6879	7.50164	0.000840759	1.95606e-05	0.00827217
KEGG_PATHWAY	hsa04620:Toll-like receptor signaling pathway	6	27.2727	1.01927e-05	MAPK1, MAP2K1, PIK3CB, AKT3, PIK3R1, AKT2	21	106	6879	18.5418	0.00118167	2.68715e-05	0.0116281
KEGG_PATHWAY	hsa04668:TNF signaling pathway	6	27.2727	1.06728e-05	MAPK1, MAP2K1, PIK3CB, AKT3, PIK3R1, AKT2	21	107	6879	18.3685	0.00123729	2.75119e-05	0.0121757
KEGG_PATHWAY	hsa04923:Regulation of lipolysis in adipocytes	5	22.7273	1.73245e-05	PIK3CB, INS, AKT3, PIK3R1, AKT2	21	56	6879	29.2474	0.00200764	4.36873e-05	0.0197634
KEGG_PATHWAY	hsa04380:Osteoclast differentiation	6	27.2727	2.85905e-05	MAPK1, MAP2K1, PIK3CB, AKT3, PIK3R1, AKT2	21	131	6879	15.0033	0.00331105	7.05624e-05	0.0326136
GOTERM_MF_DIRECT	GO:0005524~ATP binding	11	50	4.08255e-06	MAPK1, IGF1R, SGK1, KRAS, MAP2K1, PIK3CB, GSK3B, RPS6KB2, RPS6KB1, AKT3, AKT2	22	1495	16881	5.64582	0.000387768	0.000387768	0.00448746
GOTERM_MF_DIRECT	GO:0004674~protein serine/threonine kinase activity	7	31.8182	4.79667e-06	MAPK1, SGK1, MAP2K1, GSK3B, RPS6KB2, AKT3, AKT2	22	376	16881	14.2852	0.000455581	0.000227816	0.00527239
GOTERM_MF_DIRECT	GO:0016301~kinase activity	6	27.2727	9.60475e-06	MAPK1, PIK3CB, MAPKAP1, GSK3B, RPS6KB1, PIK3R1	22	241	16881	19.1034	0.00091204	0.000304106	0.0105571
GOTERM_CC_DIRECT	GO:0005829~cytosol	18	81.8182	7.14687e-10	SGK1, MAP2K1, PIK3CB, RPS6KB1, RICTOR, RPTOR, MAPK1, AKT1S1, KRAS, EIF4E, TSC1, GSK3B, MAPKAP1, TSC2, RHEB, MLST8, PIK3R1, AKT2	22	3315	18224	4.4979	5.9319e-08	5.9319e-08	7.65334e-07
GOTERM_CC_DIRECT	GO:0031931~TORC1 complex	3	13.6364	2.64664e-05	AKT1S1, MLST8, RPTOR	22	7	18224	355.013	0.00219433	0.00109777	0.0283383
GOTERM_BP_DIRECT	GO:0048015~phosphatidylinositol-mediated signaling	7	31.8182	2.75572e-09	IGF1R, PIK3CB, MAPKAP1, RPS6KB1, RICTOR, MLST8, PIK3R1	22	106	16792	50.4048	1.14362e-06	1.14362e-06	3.86429e-06
GOTERM_BP_DIRECT	GO:0018105~peptidyl-serine phosphorylation	6	27.2727	3.90115e-07	MAPK1, SGK1, GSK3B, RICTOR, AKT3, AKT2	22	125	16792	36.6371	0.000161885	8.09455e-05	0.000547047
GOTERM_BP_DIRECT	GO:0007050~cell cycle arrest	6	27.2727	7.09955e-07	TSC1, MAP2K1, TSC2, RHEB, MLST8, RPTOR	22	141	16792	32.4797	0.000294588	9.82057e-05	0.000995549
GOTERM_BP_DIRECT	GO:1900034~regulation of cellular response to heat	5	22.7273	2.07374e-06	MAPK1, AKT1S1, GSK3B, MLST8, RPTOR	22	75	16792	50.8848	0.000860234	0.000215128	0.00290792
GOTERM_BP_DIRECT	GO:0007165~signal transduction	10	45.4545	4.80966e-06	MAPK1, IGF1R, MAP2K1, PIK3CB, RPS6KB2, RHEB, RPS6KB1, AKT3, PIK3R1, AKT2	22	1161	16792	6.57427	0.00199402	0.000399123	0.00674426
GOTERM_BP_DIRECT	GO:0032008~positive regulation of TOR signaling	4	18.1818	4.83632e-06	RHEB, RICTOR, MLST8, RPTOR	22	27	16792	113.077	0.00200507	0.000334457	0.00678165
GOTERM_BP_DIRECT	GO:0006468~protein phosphorylation	7	31.8182	1.48859e-05	MAPK1, SGK1, GSK3B, RPS6KB2, RPS6KB1, AKT3, PIK3R1	22	456	16792	11.7169	0.00615863	0.000882136	0.0208721
KEGG_PATHWAY	hsa04932:Non-alcoholic fatty liver disease (NAFLD)	6	27.2727	5.66599e-05	PIK3CB, INS, GSK3B, AKT3, PIK3R1, AKT2	21	151	6879	13.0161	0.00655118	0.000136923	0.0646233
GOTERM_CC_DIRECT	GO:0005737~cytoplasm	16	72.7273	5.97606e-05	SGK1, MAP2K1, RPS6KB2, RPS6KB1, RPTOR, MAPK1, AKT1S1, KRAS, EIF4E, TSC1, GSK3B, MAPKAP1, TSC2, MLST8, AKT3, PIK3R1	22	5222	18224	2.53807	0.00494799	0.00165206	0.063977
GOTERM_MF_DIRECT	GO:0004672~protein kinase activity	6	27.2727	6.50168e-05	MAP2K1, GSK3B, RPS6KB2, RPS6KB1, AKT3, AKT2	22	359	16881	12.8243	0.00615776	0.00154301	0.0714436
GOTERM_BP_DIRECT	GO:0030335~positive regulation of cell migration	5	22.7273	7.21752e-05	MAPK1, IGF1R, INS, PIK3R1, AKT2	22	184	16792	20.7411	0.0295096	0.00373722	0.101162
GOTERM_MF_DIRECT	GO:0043560~insulin receptor substrate binding	3	13.6364	8.05207e-05	IGF1R, PIK3CB, PIK3R1	22	11	16881	209.269	0.00762059	0.00152879	0.0884732
GOTERM_MF_DIRECT	GO:0019901~protein kinase binding	6	27.2727	8.09377e-05	MAP2K1, MAPKAP1, GSK3B, RHEB, RICTOR, RPTOR	22	376	16881	12.2444	0.0076599	0.00128074	0.0889311
GOTERM_CC_DIRECT	GO:0031932~TORC2 complex	3	13.6364	8.28916e-05	MAPKAP1, RICTOR, MLST8	22	12	18224	207.091	0.00685667	0.00171859	0.0887301
GOTERM_BP_DIRECT	GO:0008286~insulin receptor signaling pathway	4	18.1818	0.000120733	IGF1R, INS, PIK3R1, AKT2	22	78	16792	39.1422	0.0488725	0.00555199	0.169168
GOTERM_BP_DIRECT	GO:0031295~T cell costimulation	4	18.1818	0.000120733	MAPKAP1, RICTOR, MLST8, PIK3R1	22	78	16792	39.1422	0.0488725	0.00555199	0.169168
GOTERM_BP_DIRECT	GO:0048009~insulin-like growth factor receptor signaling pathway	3	13.6364	0.000134332	IGF1R, TSC2, PIK3R1	22	14	16792	163.558	0.0542259	0.00555964	0.188206
GOTERM_BP_DIRECT	GO:0031929~TOR signaling	3	13.6364	0.000134332	RPS6KB1, RICTOR, RPTOR	22	14	16792	163.558	0.0542259	0.00555964	0.188206
KEGG_PATHWAY	hsa05142:Chagas disease (American trypanosomiasis)	5	22.7273	0.000198273	MAPK1, PIK3CB, AKT3, PIK3R1, AKT2	21	104	6879	15.7486	0.0227394	0.000469317	0.225973
KEGG_PATHWAY	hsa04024:cAMP signaling pathway	6	27.2727	0.000204678	MAPK1, MAP2K1, PIK3CB, AKT3, PIK3R1, AKT2	21	198	6879	9.92641	0.0234654	0.000474789	0.233265
GOTERM_MF_DIRECT	GO:0005515~protein binding	20	90.9091	0.000217881	SGK1, MAP2K1, PIK3CB, RPS6KB1, RICTOR, RPTOR, IGF1R, MAPK1, AKT1S1, KRAS, EIF4E, TSC1, INS, GSK3B, MAPKAP1, TSC2, MLST8, AKT3, PIK3R1, AKT2	22	8785	16881	1.74688	0.0204881	0.00295291	0.239235
KEGG_PATHWAY	hsa04973:Carbohydrate digestion and absorption	4	18.1818	0.000224482	PIK3CB, AKT3, PIK3R1, AKT2	21	42	6879	31.1973	0.0257066	0.000510513	0.255808
KEGG_PATHWAY	hsa04810:Regulation of actin cytoskeleton	6	27.2727	0.000269461	MAPK1, KRAS, MAP2K1, PIK3CB, INS, PIK3R1	21	210	6879	9.35918	0.0307781	0.000601005	0.306992
KEGG_PATHWAY	hsa04930:Type II diabetes mellitus	4	18.1818	0.000334465	MAPK1, PIK3CB, INS, PIK3R1	21	48	6879	27.2976	0.0380611	0.00073189	0.380921
KEGG_PATHWAY	hsa04650:Natural killer cell mediated cytotoxicity	5	22.7273	0.000366194	MAPK1, KRAS, MAP2K1, PIK3CB, PIK3R1	21	122	6879	13.4251	0.0415964	0.000786475	0.41699
KEGG_PATHWAY	hsa04611:Platelet activation	5	22.7273	0.000466529	MAPK1, PIK3CB, AKT3, PIK3R1, AKT2	21	130	6879	12.5989	0.0526911	0.000983698	0.530965
KEGG_PATHWAY	hsa05162:Measles	5	22.7273	0.000508782	PIK3CB, GSK3B, AKT3, PIK3R1, AKT2	21	133	6879	12.3147	0.057325	0.00105362	0.578926
GOTERM_BP_DIRECT	GO:0014065~phosphatidylinositol 3-kinase signaling	3	13.6364	0.000513084	IGF1R, PIK3CB, PIK3R1	22	27	16792	84.8081	0.191831	0.019176	0.717087
GOTERM_BP_DIRECT	GO:0010800~positive regulation of peptidyl-threonine phosphorylation	3	13.6364	0.000513084	MAPK1, GSK3B, RPTOR	22	27	16792	84.8081	0.191831	0.019176	0.717087
GOTERM_BP_DIRECT	GO:0032007~negative regulation of TOR signaling	3	13.6364	0.000552135	AKT1S1, TSC1, TSC2	22	28	16792	81.7792	0.20483	0.0189187	0.771469
GOTERM_MF_DIRECT	GO:0004712~protein serine/threonine/tyrosine kinase activity	3	13.6364	0.000586418	SGK1, MAP2K1, RPS6KB1	22	29	16881	79.3777	0.0542018	0.00694155	0.642709
GOTERM_BP_DIRECT	GO:0046627~negative regulation of insulin receptor signaling pathway	3	13.6364	0.000592588	TSC1, TSC2, RPS6KB1	22	29	16792	78.9592	0.218075	0.0187449	0.827773
GOTERM_BP_DIRECT	GO:0046326~positive regulation of glucose import	3	13.6364	0.000634437	INS, PIK3R1, AKT2	22	30	16792	76.3273	0.231546	0.0186366	0.88599
KEGG_PATHWAY	hsa04730:Long-term depression	4	18.1818	0.000647168	MAPK1, IGF1R, KRAS, MAP2K1	21	60	6879	21.8381	0.0723453	0.0013166	0.735861
KEGG_PATHWAY	hsa05166:HTLV-I infection	6	27.2727	0.000648435	KRAS, PIK3CB, GSK3B, AKT3, PIK3R1, AKT2	21	254	6879	7.73791	0.0724818	0.00129645	0.737297
GOTERM_MF_DIRECT	GO:0005158~insulin receptor binding	3	13.6364	0.00067063	IGF1R, INS, PIK3R1	22	31	16881	74.2566	0.0617429	0.00705624	0.734695
KEGG_PATHWAY	hsa04210:Apoptosis	4	18.1818	0.000712602	PIK3CB, AKT3, PIK3R1, AKT2	21	62	6879	21.1336	0.0793647	0.00140057	0.809987
GOTERM_BP_DIRECT	GO:0043491~protein kinase B signaling	3	13.6364	0.000768336	TSC2, RPS6KB2, RPS6KB1	22	33	16792	69.3884	0.273111	0.021041	1.07205
KEGG_PATHWAY	hsa04022:cGMP-PKG signaling pathway	5	22.7273	0.000973997	MAPK1, MAP2K1, INS, AKT3, AKT2	21	158	6879	10.3662	0.106884	0.00188221	1.1056
GOTERM_BP_DIRECT	GO:0038095~Fc-epsilon receptor signaling pathway	4	18.1818	0.00135341	MAPK1, KRAS, PIK3CB, PIK3R1	22	178	16792	17.1522	0.429957	0.0345179	1.88122
GOTERM_BP_DIRECT	GO:0035556~intracellular signal transduction	5	22.7273	0.00141483	SGK1, GSK3B, RPS6KB2, AKT3, AKT2	22	403	16792	9.46988	0.444324	0.0339725	1.96581
KEGG_PATHWAY	hsa05222:Small cell lung cancer	4	18.1818	0.00178331	PIK3CB, AKT3, PIK3R1, AKT2	21	85	6879	15.4151	0.187019	0.00338848	2.01577
GOTERM_BP_DIRECT	GO:0006417~regulation of translation	3	13.6364	0.00190215	EIF4E, TSC1, AKT2	22	52	16792	44.035	0.546221	0.0429475	2.63456
GOTERM_CC_DIRECT	GO:0005654~nucleoplasm	10	45.4545	0.00228477	MAPK1, SGK1, AKT1S1, MAPKAP1, RPS6KB2, RPS6KB1, MLST8, AKT3, RPTOR, AKT2	22	2784	18224	2.97544	0.172919	0.0372588	2.41973
KEGG_PATHWAY	hsa04320:Dorso-ventral axis formation	3	13.6364	0.00269877	MAPK1, KRAS, MAP2K1	21	27	6879	36.3968	0.269102	0.00504338	3.0361
KEGG_PATHWAY	hsa04916:Melanogenesis	4	18.1818	0.00283944	MAPK1, KRAS, MAP2K1, GSK3B	21	100	6879	13.1029	0.280964	0.00522193	3.19202
KEGG_PATHWAY	hsa05216:Thyroid cancer	3	13.6364	0.0031108	MAPK1, KRAS, MAP2K1	21	29	6879	33.8867	0.303311	0.00563121	3.49216
GOTERM_CC_DIRECT	GO:0033596~TSC1-TSC2 complex	2	9.09091	0.00345319	TSC1, TSC2	22	3	18224	552.242	0.249571	0.0467249	3.63653
KEGG_PATHWAY	hsa04114:Oocyte meiosis	4	18.1818	0.00381644	MAPK1, IGF1R, MAP2K1, INS	21	111	6879	11.8044	0.358248	0.00680068	4.26865
GOTERM_BP_DIRECT	GO:0016236~macroautophagy	3	13.6364	0.00401518	RHEB, MLST8, RPTOR	22	76	16792	30.1292	0.811688	0.0841261	5.48554
GOTERM_BP_DIRECT	GO:0010628~positive regulation of gene expression	4	18.1818	0.00405641	KRAS, MAP2K1, PIK3CB, INS	22	262	16792	11.653	0.814896	0.0808829	5.54039
GOTERM_BP_DIRECT	GO:0000165~MAPK cascade	4	18.1818	0.00405641	MAPK1, KRAS, MAP2K1, INS	22	262	16792	11.653	0.814896	0.0808829	5.54039
GOTERM_BP_DIRECT	GO:0014066~regulation of phosphatidylinositol 3-kinase signaling	3	13.6364	0.00422438	MAPK1, PIK3CB, PIK3R1	22	78	16792	29.3566	0.827409	0.0802548	5.76353
GOTERM_BP_DIRECT	GO:0050731~positive regulation of peptidyl-tyrosine phosphorylation	3	13.6364	0.00465769	INS, RICTOR, MLST8	22	82	16792	27.9246	0.85593	0.0842997	6.33694
GOTERM_MF_DIRECT	GO:0004711~ribosomal protein S6 kinase activity	2	9.09091	0.00496717	RPS6KB2, RPS6KB1	22	4	16881	383.659	0.376906	0.0462042	5.32644
KEGG_PATHWAY	hsa05169:Epstein-Barr virus infection	4	18.1818	0.00497725	PIK3CB, AKT3, PIK3R1, AKT2	21	122	6879	10.74	0.439431	0.00873139	5.53364
GOTERM_BP_DIRECT	GO:0030950~establishment or maintenance of actin cytoskeleton polarity	2	9.09091	0.00499345	MAPKAP1, RICTOR	22	4	16792	381.636	0.874754	0.0863657	6.77902
GOTERM_BP_DIRECT	GO:0090170~regulation of Golgi inheritance	2	9.09091	0.00499345	MAPK1, MAP2K1	22	4	16792	381.636	0.874754	0.0863657	6.77902
GOTERM_CC_DIRECT	GO:0048471~perinuclear region of cytoplasm	5	22.7273	0.00503401	EIF4E, TSC1, GSK3B, TSC2, RPS6KB1	22	621	18224	6.66959	0.342216	0.0580845	5.26093
KEGG_PATHWAY	hsa04010:MAPK signaling pathway	5	22.7273	0.00543507	MAPK1, KRAS, MAP2K1, AKT3, AKT2	21	253	6879	6.47374	0.468572	0.00939127	6.02834
GOTERM_BP_DIRECT	GO:0016032~viral process	4	18.1818	0.00586105	MAPK1, EIF4E, TSC2, PIK3R1	22	299	16792	10.211	0.912795	0.0966502	7.9124
KEGG_PATHWAY	hsa05219:Bladder cancer	3	13.6364	0.00615307	MAPK1, KRAS, MAP2K1	21	41	6879	23.9686	0.511278	0.0104736	6.79941
GOTERM_MF_DIRECT	GO:0043559~insulin binding	2	9.09091	0.00620529	IGF1R, PIK3R1	22	5	16881	306.927	0.446414	0.0523387	6.61331
GOTERM_BP_DIRECT	GO:0060440~trachea formation	2	9.09091	0.00748126	MAPK1, MAP2K1	22	6	16792	254.424	0.955683	0.117199	9.99477
GOTERM_BP_DIRECT	GO:0000187~activation of MAPK activity	3	13.6364	0.00780559	MAPK1, MAP2K1, PIK3CB	22	107	16792	21.4002	0.961304	0.117572	10.4063
KEGG_PATHWAY	hsa04630:Jak-STAT signaling pathway	4	18.1818	0.0080394	PIK3CB, AKT3, PIK3R1, AKT2	21	145	6879	9.03645	0.60794	0.0134785	8.79777
GOTERM_BP_DIRECT	GO:0030168~platelet activation	3	13.6364	0.00896832	MAPK1, PIK3CB, PIK3R1	22	115	16792	19.9115	0.976214	0.129309	11.8674
GOTERM_BP_DIRECT	GO:2000641~regulation of early endosome to late endosome transport	2	9.09091	0.00996315	MAPK1, MAP2K1	22	8	16792	190.818	0.984321	0.137921	13.0999
GOTERM_BP_DIRECT	GO:0032872~regulation of stress-activated MAPK cascade	2	9.09091	0.00996315	MAPK1, MAP2K1	22	8	16792	190.818	0.984321	0.137921	13.0999
GOTERM_BP_DIRECT	GO:0050900~leukocyte migration	3	13.6364	0.0100455	KRAS, PIK3CB, PIK3R1	22	122	16792	18.769	0.984853	0.13453	13.2013
GOTERM_BP_DIRECT	GO:0006935~chemotaxis	3	13.6364	0.0100455	MAPK1, MAP2K1, PIK3CB	22	122	16792	18.769	0.984853	0.13453	13.2013
GOTERM_CC_DIRECT	GO:0005886~plasma membrane	11	50	0.0101087	IGF1R, SGK1, KRAS, TSC1, MAP2K1, PIK3CB, MAPKAP1, GSK3B, AKT3, PIK3R1, AKT2	22	4121	18224	2.21111	0.569707	0.100045	10.3091
GOTERM_BP_DIRECT	GO:0038096~Fc-gamma receptor signaling pathway involved in phagocytosis	3	13.6364	0.0108486	MAPK1, PIK3CB, PIK3R1	22	127	16792	18.0301	0.989184	0.14006	14.1835
GOTERM_BP_DIRECT	GO:0060020~Bergmann glial cell differentiation	2	9.09091	0.0112019	MAPK1, MAP2K1	22	9	16792	169.616	0.990675	0.139986	14.6123
GOTERM_BP_DIRECT	GO:0045792~negative regulation of cell size	2	9.09091	0.0124391	AKT1S1, TSC1	22	10	16792	152.655	0.994454	0.149841	16.0984
GOTERM_BP_DIRECT	GO:0001952~regulation of cell-matrix adhesion	2	9.09091	0.0124391	TSC1, PIK3CB	22	10	16792	152.655	0.994454	0.149841	16.0984
GOTERM_BP_DIRECT	GO:0050852~T cell receptor signaling pathway	3	13.6364	0.0145192	MAPK1, PIK3CB, PIK3R1	22	148	16792	15.4717	0.997688	0.168005	18.5428
KEGG_PATHWAY	hsa04720:Long-term potentiation	3	13.6364	0.0154118	MAPK1, KRAS, MAP2K1	21	66	6879	14.8896	0.83498	0.02541	16.2387
GOTERM_CC_DIRECT	GO:0005739~mitochondrion	6	27.2727	0.0156622	MAPK1, SGK1, KRAS, MAP2K1, GSK3B, RPS6KB1	22	1331	18224	3.73417	0.730247	0.135482	15.5532
GOTERM_CC_DIRECT	GO:0005794~Golgi apparatus	5	22.7273	0.0156906	MAPK1, MAP2K1, MAPKAP1, TSC2, AKT3	22	863	18224	4.79933	0.730893	0.123014	15.5793
GOTERM_CC_DIRECT	GO:0005942~phosphatidylinositol 3-kinase complex	2	9.09091	0.016018	PIK3CB, PIK3R1	22	14	18224	118.338	0.738221	0.114711	15.8795
GOTERM_BP_DIRECT	GO:0051492~regulation of stress fiber assembly	2	9.09091	0.016142	TSC1, PIK3R1	22	13	16792	117.427	0.998833	0.180151	20.4037
GOTERM_BP_DIRECT	GO:2001275~positive regulation of glucose import in response to insulin stimulus	2	9.09091	0.016142	PIK3R1, AKT2	22	13	16792	117.427	0.998833	0.180151	20.4037
GOTERM_BP_DIRECT	GO:0043066~negative regulation of apoptotic process	4	18.1818	0.018289	IGF1R, GSK3B, RPS6KB1, PIK3R1	22	455	16792	6.71009	0.999529	0.196568	22.8051
GOTERM_MF_DIRECT	GO:0005159~insulin-like growth factor receptor binding	2	9.09091	0.018506	INS, PIK3R1	22	15	16881	102.309	0.830439	0.137464	18.5617
GOTERM_BP_DIRECT	GO:0045948~positive regulation of translational initiation	2	9.09091	0.0186033	RPS6KB2, RPS6KB1	22	15	16792	101.77	0.999587	0.194647	23.1509
GOTERM_BP_DIRECT	GO:0045725~positive regulation of glycogen biosynthetic process	2	9.09091	0.0186033	INS, AKT2	22	15	16792	101.77	0.999587	0.194647	23.1509
GOTERM_BP_DIRECT	GO:0016477~cell migration	3	13.6364	0.0192791	PIK3CB, GSK3B, RPS6KB1	22	172	16792	13.3129	0.99969	0.196156	23.8897
GOTERM_BP_DIRECT	GO:0008284~positive regulation of cell proliferation	4	18.1818	0.0194786	MAPK1, IGF1R, KRAS, INS	22	466	16792	6.5517	0.999715	0.193318	24.1065
KEGG_PATHWAY	hsa05203:Viral carcinogenesis	4	18.1818	0.0204554	MAPK1, KRAS, PIK3CB, PIK3R1	21	205	6879	6.39164	0.909049	0.0332029	21.0055
GOTERM_BP_DIRECT	GO:0060324~face development	2	9.09091	0.0222842	MAPK1, MAP2K1	22	18	16792	84.8081	0.999913	0.213222	27.0955
GOTERM_MF_DIRECT	GO:0043548~phosphatidylinositol 3-kinase binding	2	9.09091	0.0233856	IGF1R, PIK3R1	22	19	16881	80.7703	0.894392	0.158799	22.9032
KEGG_PATHWAY	hsa04350:TGF-beta signaling pathway	3	13.6364	0.0242781	MAPK1, RPS6KB2, RPS6KB1	21	84	6879	11.699	0.942214	0.0388237	24.4521
GOTERM_CC_DIRECT	GO:0005634~nucleus	12	54.5455	0.0245181	MAPK1, SGK1, TSC1, MAP2K1, PIK3CB, MAPKAP1, GSK3B, TSC2, RPS6KB2, RPS6KB1, PIK3R1, AKT2	22	5415	18224	1.83571	0.872592	0.157766	23.3429
KEGG_PATHWAY	hsa04540:Gap junction	3	13.6364	0.0264762	MAPK1, KRAS, MAP2K1	21	88	6879	11.1672	0.955516	0.0417425	26.3711
GOTERM_BP_DIRECT	GO:0051000~positive regulation of nitric-oxide synthase activity	2	9.09091	0.0271716	KRAS, INS	22	22	16792	69.3884	0.999989	0.248592	32.0429
KEGG_PATHWAY	hsa04912:GnRH signaling pathway	3	13.6364	0.0281764	MAPK1, KRAS, MAP2K1	21	91	6879	10.7991	0.96368	0.0438137	27.8249
GOTERM_CC_DIRECT	GO:0005769~early endosome	3	13.6364	0.0282191	MAPK1, MAP2K1, AKT2	22	229	18224	10.8519	0.907066	0.167031	26.4007
GOTERM_BP_DIRECT	GO:0070371~ERK1 and ERK2 cascade	2	9.09091	0.0296066	MAPK1, MAP2K1	22	24	16792	63.6061	0.999996	0.262288	34.3896
GOTERM_BP_DIRECT	GO:0051090~regulation of sequence-specific DNA binding transcription factor activity	2	9.09091	0.0308219	MAPK1, SGK1	22	25	16792	61.0618	0.999998	0.26607	35.5325
GOTERM_BP_DIRECT	GO:0030878~thyroid gland development	2	9.09091	0.0308219	MAPK1, MAP2K1	22	25	16792	61.0618	0.999998	0.26607	35.5325
GOTERM_BP_DIRECT	GO:0006915~apoptotic process	4	18.1818	0.0324011	MAPK1, SGK1, RPS6KB1, AKT2	22	567	16792	5.38464	0.999999	0.272314	36.99
GOTERM_BP_DIRECT	GO:0045931~positive regulation of mitotic cell cycle	2	9.09091	0.0344591	EIF4E, RPS6KB1	22	28	16792	54.5195	1	0.281611	38.8435
GOTERM_BP_DIRECT	GO:0007616~long-term memory	2	9.09091	0.0344591	SGK1, RPS6KB1	22	28	16792	54.5195	1	0.281611	38.8435
GOTERM_BP_DIRECT	GO:0071549~cellular response to dexamethasone stimulus	2	9.09091	0.0356686	EIF4E, RPS6KB1	22	29	16792	52.6395	1	0.284629	39.909
GOTERM_BP_DIRECT	GO:0001662~behavioral fear response	2	9.09091	0.0356686	EIF4E, RPS6KB1	22	29	16792	52.6395	1	0.284629	39.909
KEGG_PATHWAY	hsa05145:Toxoplasmosis	3	13.6364	0.0399186	MAPK1, AKT3, AKT2	21	110	6879	8.93377	0.991134	0.061063	37.1717
KEGG_PATHWAY	hsa04726:Serotonergic synapse	3	13.6364	0.040581	MAPK1, KRAS, MAP2K1	21	111	6879	8.85328	0.991816	0.0612737	37.6645
GOTERM_BP_DIRECT	GO:0071902~positive regulation of protein serine/threonine kinase activity	2	9.09091	0.0428955	MAP2K1, RPTOR	22	35	16792	43.6156	1	0.326682	45.9249
GOTERM_BP_DIRECT	GO:0038128~ERBB2 signaling pathway	2	9.09091	0.0464895	KRAS, PIK3R1	22	38	16792	40.1722	1	0.343177	48.7037
GOTERM_BP_DIRECT	GO:0018107~peptidyl-threonine phosphorylation	2	9.09091	0.0464895	MAPK1, GSK3B	22	38	16792	40.1722	1	0.343177	48.7037
GOTERM_BP_DIRECT	GO:0045740~positive regulation of DNA replication	2	9.09091	0.0512616	IGF1R, INS	22	42	16792	36.3463	1	0.365528	52.1887
KEGG_PATHWAY	hsa04360:Axon guidance	3	13.6364	0.0517386	MAPK1, KRAS, GSK3B	21	127	6879	7.73791	0.997893	0.0769137	45.4523
GOTERM_MF_DIRECT	GO:0016303~1-phosphatidylinositol-3-kinase activity	2	9.09091	0.0521814	PIK3CB, PIK3R1	22	43	16881	35.6892	0.99385	0.304873	44.5167
GOTERM_BP_DIRECT	GO:0048538~thymus development	2	9.09091	0.0524511	MAPK1, MAP2K1	22	43	16792	35.5011	1	0.366378	53.0225
KEGG_PATHWAY	hsa04728:Dopaminergic synapse	3	13.6364	0.0524695	GSK3B, AKT3, AKT2	21	128	6879	7.67746	0.998073	0.0770251	45.9301
GOTERM_MF_DIRECT	GO:0019902~phosphatase binding	2	9.09091	0.0545442	MAPK1, TSC2	22	45	16881	34.103	0.995148	0.298984	46.0182
GOTERM_BP_DIRECT	GO:0030838~positive regulation of actin filament polymerization	2	9.09091	0.0548257	RICTOR, MLST8	22	45	16792	33.9232	1	0.373749	54.6467
GOTERM_BP_DIRECT	GO:0032956~regulation of actin cytoskeleton organization	2	9.09091	0.0571947	RICTOR, MLST8	22	47	16792	32.4797	1	0.380751	56.215
GOTERM_BP_DIRECT	GO:0036092~phosphatidylinositol-3-phosphate biosynthetic process	2	9.09091	0.0595581	PIK3CB, PIK3R1	22	49	16792	31.154	1	0.387412	57.7292
KEGG_PATHWAY	hsa04261:Adrenergic signaling in cardiomyocytes	3	13.6364	0.0599829	MAPK1, AKT3, AKT2	21	138	6879	7.12112	0.999235	0.0868255	50.6246
GOTERM_BP_DIRECT	GO:0045596~negative regulation of cell differentiation	2	9.09091	0.0619158	MAPK1, KRAS	22	51	16792	29.9323	1	0.393755	59.1912
GOTERM_CC_DIRECT	GO:0005622~intracellular	5	22.7273	0.0626655	MAPK1, KRAS, PIK3CB, RHEB, AKT3	22	1332	18224	3.10947	0.995352	0.318642	49.9932
GOTERM_MF_DIRECT	GO:0042802~identical protein binding	4	18.1818	0.0638582	MAPK1, IGF1R, INS, RPS6KB1	22	749	16881	4.09783	0.998106	0.324165	51.5844
GOTERM_BP_DIRECT	GO:0045727~positive regulation of translation	2	9.09091	0.0642679	MAPK1, RPS6KB1	22	53	16792	28.8027	1	0.399802	60.6028
GOTERM_BP_DIRECT	GO:0021766~hippocampus development	2	9.09091	0.0677854	TSC1, GSK3B	22	56	16792	27.2597	1	0.411179	62.6295
GOTERM_BP_DIRECT	GO:0007173~epidermal growth factor receptor signaling pathway	2	9.09091	0.0677854	KRAS, PIK3R1	22	56	16792	27.2597	1	0.411179	62.6295
KEGG_PATHWAY	hsa04921:Oxytocin signaling pathway	3	13.6364	0.069464	MAPK1, KRAS, MAP2K1	21	150	6879	6.55143	0.999764	0.099128	56.0173
GOTERM_BP_DIRECT	GO:0017148~negative regulation of translation	2	9.09091	0.0701235	EIF4E, TSC1	22	58	16792	26.3197	1	0.416543	63.9226
GOTERM_BP_DIRECT	GO:0006661~phosphatidylinositol biosynthetic process	2	9.09091	0.0701235	PIK3CB, PIK3R1	22	58	16792	26.3197	1	0.416543	63.9226
GOTERM_MF_DIRECT	GO:0042277~peptide binding	2	9.09091	0.0709274	RPS6KB2, RPS6KB1	22	59	16881	26.0108	0.999078	0.337091	55.4548
GOTERM_BP_DIRECT	GO:0006950~response to stress	2	9.09091	0.0736201	MAPK1, SGK1	22	61	16792	25.0253	1	0.426938	65.7791
GOTERM_CC_DIRECT	GO:0005925~focal adhesion	3	13.6364	0.0737634	MAPK1, KRAS, MAP2K1	22	391	18224	6.35573	0.998271	0.345573	55.9814
GOTERM_MF_DIRECT	GO:0046934~phosphatidylinositol-4,5-bisphosphate 3-kinase activity	2	9.09091	0.0744027	PIK3CB, PIK3R1	22	62	16881	24.7522	0.999354	0.335059	57.2526
GOTERM_BP_DIRECT	GO:0043087~regulation of GTPase activity	2	9.09091	0.0782628	RICTOR, MLST8	22	65	16792	23.4853	1	0.441841	68.1071
GOTERM_BP_DIRECT	GO:0051384~response to glucocorticoid	2	9.09091	0.0782628	KRAS, RPS6KB1	22	65	16792	23.4853	1	0.441841	68.1071
GOTERM_BP_DIRECT	GO:0006006~glucose metabolic process	2	9.09091	0.0805758	INS, AKT2	22	67	16792	22.7843	1	0.446172	69.2112
GOTERM_BP_DIRECT	GO:0032868~response to insulin	2	9.09091	0.0805758	TSC1, RPS6KB1	22	67	16792	22.7843	1	0.446172	69.2112
GOTERM_CC_DIRECT	GO:0043234~protein complex	3	13.6364	0.0807469	MAPK1, AKT1S1, TSC1	22	412	18224	6.03177	0.999077	0.35387	59.4081
GOTERM_BP_DIRECT	GO:0001938~positive regulation of endothelial cell proliferation	2	9.09091	0.0828833	RICTOR, RPTOR	22	69	16792	22.1238	1	0.450328	70.2772
GOTERM_BP_DIRECT	GO:0033138~positive regulation of peptidyl-serine phosphorylation	2	9.09091	0.0840349	GSK3B, RPTOR	22	70	16792	21.8078	1	0.449634	70.7964
GOTERM_BP_DIRECT	GO:0031647~regulation of protein stability	2	9.09091	0.0840349	MAPK1, KRAS	22	70	16792	21.8078	1	0.449634	70.7964
GOTERM_BP_DIRECT	GO:0048010~vascular endothelial growth factor receptor signaling pathway	2	9.09091	0.0863342	PIK3CB, PIK3R1	22	72	16792	21.202	1	0.453578	71.8077
GOTERM_BP_DIRECT	GO:0008285~negative regulation of cell proliferation	3	13.6364	0.0868075	TSC1, MAP2K1, TSC2	22	396	16792	5.78237	1	0.450191	72.0118
GOTERM_BP_DIRECT	GO:0045444~fat cell differentiation	2	9.09091	0.0874817	GSK3B, AKT2	22	73	16792	20.9116	1	0.447679	72.3002
GOTERM_BP_DIRECT	GO:0030334~regulation of cell migration	2	9.09091	0.0886279	SGK1, AKT2	22	74	16792	20.629	1	0.447067	72.7841
GOTERM_BP_DIRECT	GO:0001843~neural tube closure	2	9.09091	0.0920582	TSC1, TSC2	22	77	16792	19.8253	1	0.455154	74.1859
GOTERM_BP_DIRECT	GO:0032869~cellular response to insulin stimulus	2	9.09091	0.0920582	PIK3R1, AKT2	22	77	16792	19.8253	1	0.455154	74.1859
KEGG_PATHWAY	hsa05152:Tuberculosis	3	13.6364	0.0924475	MAPK1, AKT3, AKT2	21	177	6879	5.55206	0.999987	0.129702	66.9352
KEGG_PATHWAY	hsa05034:Alcoholism	3	13.6364	0.0924475	MAPK1, KRAS, MAP2K1	21	177	6879	5.55206	0.999987	0.129702	66.9352
GOTERM_BP_DIRECT	GO:0090630~activation of GTPase activity	2	9.09091	0.0943382	TSC1, AKT2	22	79	16792	19.3234	1	0.45869	75.0802
KEGG_PATHWAY	hsa05020:Prion diseases	2	9.09091	0.0944693	MAPK1, MAP2K1	21	34	6879	19.2689	0.99999	0.130972	67.7659

## Sheet: mTOR-D图
Category	Term	Count	%	PValue	Genes	List Total	Pop Hits	Pop Total	Fold Enrichment	Bonferroni	Benjamini	FDR
KEGG_PATHWAY	hsa05110:Vibrio cholerae infection	9	100	6.07596e-18	ATP6V1C1, ATP6V1A, ATP6V1C2, ATP6V1E1, ATP6V1E2, ATP6V1H, ATP6V1G2, ATP6V1G3, ATP6V1F	9	52	6879	132.288	5.46836e-17	5.46836e-17	3.49672e-15
KEGG_PATHWAY	hsa04721:Synaptic vesicle cycle	9	100	3.12696e-17	ATP6V1C1, ATP6V1A, ATP6V1C2, ATP6V1E1, ATP6V1E2, ATP6V1H, ATP6V1G2, ATP6V1G3, ATP6V1F	9	63	6879	109.19	2.81426e-16	1.40713e-16	1.79957e-14
KEGG_PATHWAY	hsa04966:Collecting duct acid secretion	8	88.8889	4.91283e-17	ATP6V1C1, ATP6V1A, ATP6V1C2, ATP6V1E1, ATP6V1E2, ATP6V1G2, ATP6V1G3, ATP6V1F	9	27	6879	226.469	4.42154e-16	1.47385e-16	2.82733e-14
KEGG_PATHWAY	hsa05120:Epithelial cell signaling in Helicobacter pylori infection	9	100	5.26613e-17	ATP6V1C1, ATP6V1A, ATP6V1C2, ATP6V1E1, ATP6V1E2, ATP6V1H, ATP6V1G2, ATP6V1G3, ATP6V1F	9	67	6879	102.672	4.73951e-16	1.18488e-16	3.03066e-14
KEGG_PATHWAY	hsa05323:Rheumatoid arthritis	9	100	5.18969e-16	ATP6V1C1, ATP6V1A, ATP6V1C2, ATP6V1E1, ATP6V1E2, ATP6V1H, ATP6V1G2, ATP6V1G3, ATP6V1F	9	88	6879	78.1705	4.996e-15	9.99201e-16	3.21965e-13
KEGG_PATHWAY	hsa00190:Oxidative phosphorylation	9	100	1.5819e-14	ATP6V1C1, ATP6V1A, ATP6V1C2, ATP6V1E1, ATP6V1E2, ATP6V1H, ATP6V1G2, ATP6V1G3, ATP6V1F	9	133	6879	51.7218	1.41887e-13	2.36478e-14	9.07052e-12
KEGG_PATHWAY	hsa04145:Phagosome	9	100	4.24465e-14	ATP6V1C1, ATP6V1A, ATP6V1C2, ATP6V1E1, ATP6V1E2, ATP6V1H, ATP6V1G2, ATP6V1G3, ATP6V1F	9	150	6879	45.86	3.81695e-13	5.4512e-14	2.44027e-11
KEGG_PATHWAY	hsa01100:Metabolic pathways	9	100	9.54112e-07	ATP6V1C1, ATP6V1A, ATP6V1C2, ATP6V1E1, ATP6V1E2, ATP6V1H, ATP6V1G2, ATP6V1G3, ATP6V1F	9	1219	6879	5.64315	8.58698e-06	1.07338e-06	0.000549091
GOTERM_MF_DIRECT	GO:0046961~proton-transporting ATPase activity, rotational mechanism	7	77.7778	2.00272e-16	ATP6V1C1, ATP6V1A, ATP6V1C2, ATP6V1E1, ATP6V1E2, ATP6V1H, ATP6V1F	9	26	16881	504.987	2.88658e-15	2.88658e-15	1.44329e-13
GOTERM_MF_DIRECT	GO:0008553~hydrogen-exporting ATPase activity, phosphorylative mechanism	6	66.6667	6.17586e-16	ATP6V1C1, ATP6V1C2, ATP6V1E1, ATP6V1E2, ATP6V1G2, ATP6V1G3	9	9	16881	1250.44	8.65974e-15	4.32987e-15	4.44089e-13
GOTERM_CC_DIRECT	GO:0016469~proton-transporting two-sector ATPase complex	4	44.4444	5.5501e-10	ATP6V1C1, ATP6V1A, ATP6V1E1, ATP6V1F	9	5	18224	1619.91	1.22102e-08	1.22102e-08	4.3437e-07
GOTERM_CC_DIRECT	GO:0033180~proton-transporting V-type ATPase, V1 domain	4	44.4444	3.10614e-09	ATP6V1C1, ATP6V1A, ATP6V1C2, ATP6V1F	9	8	18224	1012.44	6.8335e-08	3.41675e-08	2.43097e-06
GOTERM_CC_DIRECT	GO:0000221~vacuolar proton-transporting V-type ATPase, V1 domain	3	33.3333	5.05767e-07	ATP6V1C1, ATP6V1C2, ATP6V1H	9	3	18224	2024.89	1.11268e-05	3.70895e-06	0.00039583
GOTERM_CC_DIRECT	GO:0005829~cytosol	9	100	1.19046e-06	ATP6V1C1, ATP6V1A, ATP6V1C2, ATP6V1E1, ATP6V1E2, ATP6V1H, ATP6V1G2, ATP6V1G3, ATP6V1F	9	3315	18224	5.49744	2.61898e-05	6.54751e-06	0.000931691
GOTERM_CC_DIRECT	GO:0005765~lysosomal membrane	5	55.5556	3.33745e-06	ATP6V1C1, ATP6V1A, ATP6V1C2, ATP6V1E1, ATP6V1H	9	274	18224	36.9505	7.34213e-05	1.46847e-05	0.00261197
GOTERM_CC_DIRECT	GO:0016471~vacuolar proton-transporting V-type ATPase complex	3	33.3333	1.11049e-05	ATP6V1G2, ATP6V1G3, ATP6V1F	9	12	18224	506.222	0.000244279	4.07174e-05	0.00869075
GOTERM_MF_DIRECT	GO:0015078~hydrogen ion transmembrane transporter activity	3	33.3333	9.67855e-05	ATP6V1C1, ATP6V1C2, ATP6V1F	9	32	16881	175.844	0.00125748	0.000419336	0.0640606
GOTERM_CC_DIRECT	GO:0033178~proton-transporting two-sector ATPase complex, catalytic domain	2	22.2222	0.00131644	ATP6V1E1, ATP6V1E2	9	3	18224	1349.93	0.0285648	0.00413155	1.02567
GOTERM_CC_DIRECT	GO:0070062~extracellular exosome	6	66.6667	0.00323448	ATP6V1C1, ATP6V1A, ATP6V1C2, ATP6V1E1, ATP6V1H, ATP6V1F	9	2811	18224	4.32207	0.0687932	0.00886966	2.50364
GOTERM_CC_DIRECT	GO:0005902~microvillus	2	22.2222	0.0247544	ATP6V1A, ATP6V1E1	9	57	18224	71.0487	0.423887	0.059433	17.8132
GOTERM_MF_DIRECT	GO:0051117~ATPase binding	2	22.2222	0.0345427	ATP6V1E1, ATP6V1G3	9	74	16881	50.6937	0.366816	0.107964	20.7638

## Sheet: mTOR-E图
Category	Term	Count	%	PValue	Genes	List Total	Pop Hits	Pop Total	Fold Enrichment	Bonferroni	Benjamini	FDR
GOTERM_BP_DIRECT	GO:0048015~phosphatidylinositol-mediated signaling	8	88.8889	2.59797e-15	AKT1, PDPK1, GRB2, RHOA, PIK3CA, MTOR, PTEN, IRS1	9	106	16792	140.813	1.00098e-12	1.00098e-12	3.55271e-12
KEGG_PATHWAY	hsa04150:mTOR signaling pathway	7	77.7778	7.6177e-12	AKT1, PDPK1, STK11, PIK3CA, MTOR, PTEN, IRS1	9	58	6879	92.2471	7.08445e-10	7.08445e-10	8.33945e-09
KEGG_PATHWAY	hsa04068:FoxO signaling pathway	7	77.7778	1.32529e-09	AKT1, PDPK1, GRB2, STK11, PIK3CA, PTEN, IRS1	9	134	6879	39.9279	1.23252e-07	6.16262e-08	1.45086e-06
KEGG_PATHWAY	hsa04151:PI3K-Akt signaling pathway	8	88.8889	5.76454e-09	AKT1, PDPK1, GRB2, STK11, PIK3CA, MTOR, PTEN, IRS1	9	345	6879	17.7237	5.36102e-07	1.78701e-07	6.31073e-06
KEGG_PATHWAY	hsa05215:Prostate cancer	6	66.6667	1.66042e-08	AKT1, PDPK1, GRB2, PIK3CA, MTOR, PTEN	9	88	6879	52.1136	1.54419e-06	3.86047e-07	1.81774e-05
GOTERM_BP_DIRECT	GO:0031295~T cell costimulation	5	55.5556	2.97282e-08	AKT1, PDPK1, GRB2, PIK3CA, MTOR	9	78	16792	119.601	1.16534e-05	5.8267e-06	4.13431e-05
KEGG_PATHWAY	hsa04931:Insulin resistance	6	66.6667	4.68988e-08	AKT1, PDPK1, PIK3CA, MTOR, PTEN, IRS1	9	108	6879	42.463	4.36158e-06	8.72317e-07	5.13424e-05
KEGG_PATHWAY	hsa04722:Neurotrophin signaling pathway	6	66.6667	7.98289e-08	AKT1, PDPK1, GRB2, RHOA, PIK3CA, IRS1	9	120	6879	38.2167	7.42406e-06	1.23735e-06	8.73926e-05
KEGG_PATHWAY	hsa04152:AMPK signaling pathway	6	66.6667	9.04075e-08	AKT1, PDPK1, STK11, PIK3CA, MTOR, IRS1	9	123	6879	37.2846	8.40786e-06	1.20113e-06	9.89734e-05
KEGG_PATHWAY	hsa04910:Insulin signaling pathway	6	66.6667	1.61287e-07	AKT1, PDPK1, GRB2, PIK3CA, MTOR, IRS1	9	138	6879	33.2319	1.49996e-05	1.87496e-06	0.000176568
KEGG_PATHWAY	hsa05213:Endometrial cancer	5	55.5556	1.98786e-07	AKT1, PDPK1, GRB2, PIK3CA, PTEN	9	52	6879	73.4936	1.8487e-05	2.05412e-06	0.000217621
KEGG_PATHWAY	hsa05214:Glioma	5	55.5556	4.94117e-07	AKT1, GRB2, PIK3CA, MTOR, PTEN	9	65	6879	58.7949	4.59518e-05	4.59528e-06	0.000540932
KEGG_PATHWAY	hsa05205:Proteoglycans in cancer	6	66.6667	1.03113e-06	AKT1, PDPK1, GRB2, RHOA, PIK3CA, MTOR	9	200	6879	22.93	9.58902e-05	8.71767e-06	0.00112882
GOTERM_CC_DIRECT	GO:0005829~cytosol	9	100	1.19046e-06	AKT1, PDPK1, GRB2, STK11, RHOA, PIK3CA, MTOR, PTEN, IRS1	9	3315	18224	5.49744	7.26155e-05	7.26155e-05	0.00119723
KEGG_PATHWAY	hsa04510:Focal adhesion	6	66.6667	1.19446e-06	AKT1, PDPK1, GRB2, RHOA, PIK3CA, PTEN	9	206	6879	22.2621	0.000111078	9.25699e-06	0.00130762
GOTERM_MF_DIRECT	GO:0016301~kinase activity	5	55.5556	2.71175e-06	AKT1, PDPK1, STK11, PIK3CA, MTOR	9	241	16881	38.9142	0.00017896	0.00017896	0.00277256
KEGG_PATHWAY	hsa04660:T cell receptor signaling pathway	5	55.5556	2.81517e-06	AKT1, PDPK1, GRB2, RHOA, PIK3CA	9	100	6879	38.2167	0.000261776	2.01391e-05	0.00308185
KEGG_PATHWAY	hsa05231:Choline metabolism in cancer	5	55.5556	2.92988e-06	AKT1, PDPK1, GRB2, PIK3CA, MTOR	9	101	6879	37.8383	0.000272442	1.94626e-05	0.00320743
KEGG_PATHWAY	hsa04071:Sphingolipid signaling pathway	5	55.5556	5.84224e-06	AKT1, PDPK1, RHOA, PIK3CA, PTEN	9	120	6879	31.8472	0.000543182	3.62213e-05	0.0063956
GOTERM_BP_DIRECT	GO:0014066~regulation of phosphatidylinositol 3-kinase signaling	4	44.4444	5.30973e-06	AKT1, GRB2, PIK3CA, IRS1	9	78	16792	95.6809	0.00207925	0.000693566	0.00738401
GOTERM_BP_DIRECT	GO:0045792~negative regulation of cell size	3	33.3333	8.92059e-06	AKT1, MTOR, PTEN	9	10	16792	559.733	0.00349078	0.00087384	0.0124052
GOTERM_MF_DIRECT	GO:0004674~protein serine/threonine kinase activity	5	55.5556	1.57974e-05	AKT1, PDPK1, STK11, PIK3CA, MTOR	9	376	16881	24.9424	0.00104209	0.000521183	0.0161507
GOTERM_BP_DIRECT	GO:0030168~platelet activation	4	44.4444	1.70905e-05	AKT1, PDPK1, RHOA, PIK3CA	9	115	16792	64.8966	0.00667713	0.00133901	0.0237652
KEGG_PATHWAY	hsa05221:Acute myeloid leukemia	4	44.4444	2.78076e-05	AKT1, GRB2, PIK3CA, MTOR	9	56	6879	54.5952	0.0025828	0.000161621	0.0304381
KEGG_PATHWAY	hsa05223:Non-small cell lung cancer	4	44.4444	2.78076e-05	AKT1, PDPK1, GRB2, PIK3CA	9	56	6879	54.5952	0.0025828	0.000161621	0.0304381
KEGG_PATHWAY	hsa05200:Pathways in cancer	6	66.6667	2.87987e-05	AKT1, GRB2, RHOA, PIK3CA, MTOR, PTEN	9	393	6879	11.6692	0.00267474	0.000157536	0.0315229
KEGG_PATHWAY	hsa05230:Central carbon metabolism in cancer	4	44.4444	4.16128e-05	AKT1, PIK3CA, MTOR, PTEN	9	64	6879	47.7708	0.00386259	0.000214981	0.0455461
GOTERM_BP_DIRECT	GO:0006468~protein phosphorylation	5	55.5556	3.44507e-05	AKT1, PDPK1, STK11, PIK3CA, MTOR	9	456	16792	20.4581	0.0134141	0.00224828	0.0479
GOTERM_BP_DIRECT	GO:0050852~T cell receptor signaling pathway	4	44.4444	3.63739e-05	PDPK1, STK11, PIK3CA, PTEN	9	148	16792	50.4264	0.0141577	0.0020349	0.0505735
KEGG_PATHWAY	hsa04664:Fc epsilon RI signaling pathway	4	44.4444	4.99448e-05	AKT1, PDPK1, GRB2, PIK3CA	9	68	6879	44.9608	0.00463421	0.000244443	0.0546634
KEGG_PATHWAY	hsa04920:Adipocytokine signaling pathway	4	44.4444	5.44932e-05	AKT1, STK11, MTOR, IRS1	9	70	6879	43.6762	0.00505518	0.000253368	0.0596402
GOTERM_BP_DIRECT	GO:0046777~protein autophosphorylation	4	44.4444	5.69497e-05	AKT1, PDPK1, STK11, MTOR	9	172	16792	43.3902	0.0220775	0.00278672	0.0791711
GOTERM_BP_DIRECT	GO:0043542~endothelial cell migration	3	33.3333	8.01199e-05	RHOA, PIK3CA, PTEN	9	29	16792	193.011	0.0309202	0.00348373	0.111366
KEGG_PATHWAY	hsa04012:ErbB signaling pathway	4	44.4444	0.000104537	AKT1, GRB2, PIK3CA, MTOR	9	87	6879	35.1418	0.00967536	0.000462868	0.114382
GOTERM_BP_DIRECT	GO:0043491~protein kinase B signaling	3	33.3333	0.000104096	AKT1, PIK3CA, PTEN	9	33	16792	169.616	0.0399864	0.00407246	0.14467
GOTERM_MF_DIRECT	GO:0016303~1-phosphatidylinositol-3-kinase activity	3	33.3333	0.000175745	GRB2, PIK3CA, IRS1	9	43	16881	130.86	0.0115332	0.00385927	0.179543
GOTERM_BP_DIRECT	GO:0038128~ERBB2 signaling pathway	3	33.3333	0.000138433	AKT1, GRB2, PIK3CA	9	38	16792	147.298	0.052823	0.00492142	0.192347
GOTERM_BP_DIRECT	GO:0018107~peptidyl-threonine phosphorylation	3	33.3333	0.000138433	AKT1, PDPK1, MTOR	9	38	16792	147.298	0.052823	0.00492142	0.192347
KEGG_PATHWAY	hsa05206:MicroRNAs in cancer	5	55.5556	0.000179409	GRB2, RHOA, MTOR, PTEN, IRS1	9	286	6879	13.3625	0.0165481	0.000758193	0.196233
KEGG_PATHWAY	hsa04919:Thyroid hormone signaling pathway	4	44.4444	0.000239789	AKT1, PDPK1, PIK3CA, MTOR	9	115	6879	26.5855	0.0220562	0.000969229	0.262196
GOTERM_BP_DIRECT	GO:0036092~phosphatidylinositol-3-phosphate biosynthetic process	3	33.3333	0.000230968	GRB2, PIK3CA, IRS1	9	49	16792	114.231	0.0865712	0.00751742	0.32073
GOTERM_MF_DIRECT	GO:0046934~phosphatidylinositol-4,5-bisphosphate 3-kinase activity	3	33.3333	0.000366379	GRB2, PIK3CA, IRS1	9	62	16881	90.7581	0.0238953	0.00602812	0.373968
KEGG_PATHWAY	hsa05160:Hepatitis C	4	44.4444	0.000368587	AKT1, PDPK1, GRB2, PIK3CA	9	133	6879	22.9875	0.0337038	0.00142752	0.402771
GOTERM_BP_DIRECT	GO:0007173~epidermal growth factor receptor signaling pathway	3	33.3333	0.000301953	PDPK1, GRB2, PIK3CA	9	56	16792	99.9524	0.111645	0.00906509	0.419111
GOTERM_MF_DIRECT	GO:0004672~protein kinase activity	4	44.4444	0.000493358	AKT1, PDPK1, STK11, MTOR	9	359	16881	20.8988	0.032045	0.00649276	0.503282
KEGG_PATHWAY	hsa05161:Hepatitis B	4	44.4444	0.000475374	AKT1, GRB2, PIK3CA, PTEN	9	145	6879	21.0851	0.0432569	0.00176725	0.519187
GOTERM_MF_DIRECT	GO:0019901~protein kinase binding	4	44.4444	0.000564868	PDPK1, GRB2, MTOR, PTEN	9	376	16881	19.9539	0.0366051	0.00619603	0.576041
GOTERM_BP_DIRECT	GO:0032869~cellular response to insulin stimulus	3	33.3333	0.000570845	AKT1, PDPK1, IRS1	9	77	16792	72.6926	0.200553	0.0158611	0.790959
GOTERM_BP_DIRECT	GO:0008286~insulin receptor signaling pathway	3	33.3333	0.000585728	AKT1, GRB2, IRS1	9	78	16792	71.7607	0.205206	0.0151949	0.811502
KEGG_PATHWAY	hsa04960:Aldosterone-regulated sodium reabsorption	3	33.3333	0.000858348	PDPK1, PIK3CA, IRS1	9	39	6879	58.7949	0.076755	0.00306685	0.935674
KEGG_PATHWAY	hsa04062:Chemokine signaling pathway	4	44.4444	0.000985444	AKT1, GRB2, RHOA, PIK3CA	9	186	6879	16.4373	0.0876134	0.00339022	1.07354
GOTERM_BP_DIRECT	GO:0046854~phosphatidylinositol phosphorylation	3	33.3333	0.000849305	GRB2, PIK3CA, IRS1	9	94	16792	59.5461	0.283279	0.0206016	1.17468
GOTERM_BP_DIRECT	GO:0071456~cellular response to hypoxia	3	33.3333	0.000885606	AKT1, MTOR, PTEN	9	96	16792	58.3056	0.293415	0.0202228	1.2246
GOTERM_BP_DIRECT	GO:0016310~phosphorylation	3	33.3333	0.000960431	AKT1, PIK3CA, MTOR	9	100	16792	55.9733	0.313857	0.0207087	1.32743
GOTERM_BP_DIRECT	GO:0042593~glucose homeostasis	3	33.3333	0.0009796	AKT1, STK11, IRS1	9	101	16792	55.4191	0.318999	0.0200175	1.35376
KEGG_PATHWAY	hsa04930:Type II diabetes mellitus	3	33.3333	0.0012998	PIK3CA, MTOR, IRS1	9	48	6879	47.7708	0.113931	0.00431069	1.41379
KEGG_PATHWAY	hsa04014:Ras signaling pathway	4	44.4444	0.00173395	AKT1, GRB2, RHOA, PIK3CA	9	226	6879	13.528	0.149046	0.00554998	1.88196
KEGG_PATHWAY	hsa04923:Regulation of lipolysis in adipocytes	3	33.3333	0.0017663	AKT1, PIK3CA, IRS1	9	56	6879	40.9464	0.151607	0.00546537	1.91675
GOTERM_BP_DIRECT	GO:0018105~peptidyl-serine phosphorylation	3	33.3333	0.00149476	AKT1, PDPK1, MTOR	9	125	16792	44.7787	0.443665	0.0288936	2.05884
KEGG_PATHWAY	hsa05210:Colorectal cancer	3	33.3333	0.0021613	AKT1, RHOA, PIK3CA	9	62	6879	36.9839	0.182266	0.0064699	2.34081
GOTERM_CC_DIRECT	GO:0005886~plasma membrane	7	77.7778	0.00243051	AKT1, PDPK1, GRB2, RHOA, PIK3CA, PTEN, IRS1	9	4121	18224	3.43951	0.137949	0.0715332	2.4176
KEGG_PATHWAY	hsa05211:Renal cell carcinoma	3	33.3333	0.0024459	AKT1, GRB2, PIK3CA	9	66	6879	34.7424	0.203674	0.00709183	2.6453
KEGG_PATHWAY	hsa04662:B cell receptor signaling pathway	3	33.3333	0.00267042	AKT1, GRB2, PIK3CA	9	69	6879	33.2319	0.220171	0.00750746	2.88491
KEGG_PATHWAY	hsa04917:Prolactin signaling pathway	3	33.3333	0.00282534	AKT1, GRB2, PIK3CA	9	71	6879	32.2958	0.231357	0.0077092	3.04994
KEGG_PATHWAY	hsa05218:Melanoma	3	33.3333	0.00282534	AKT1, PIK3CA, PTEN	9	71	6879	32.2958	0.231357	0.0077092	3.04994
GOTERM_CC_DIRECT	GO:0005654~nucleoplasm	6	66.6667	0.00309498	AKT1, PDPK1, GRB2, STK11, MTOR, PTEN	9	2784	18224	4.36398	0.172285	0.0610836	3.06932
KEGG_PATHWAY	hsa05220:Chronic myeloid leukemia	3	33.3333	0.00290437	AKT1, GRB2, PIK3CA	9	72	6879	31.8472	0.237002	0.00769877	3.13402
GOTERM_MF_DIRECT	GO:0005524~ATP binding	5	55.5556	0.0032046	AKT1, PDPK1, STK11, PIK3CA, MTOR	9	1495	16881	6.27313	0.190908	0.02981	3.2285
GOTERM_BP_DIRECT	GO:0007568~aging	3	33.3333	0.00258476	AKT1, GRB2, PTEN	9	165	16792	33.9232	0.63743	0.0471629	3.53528
GOTERM_BP_DIRECT	GO:0016477~cell migration	3	33.3333	0.00280473	PDPK1, RHOA, PTEN	9	172	16792	32.5426	0.667461	0.0488137	3.83073
GOTERM_BP_DIRECT	GO:0038095~Fc-epsilon receptor signaling pathway	3	33.3333	0.00300011	PDPK1, GRB2, PIK3CA	9	178	16792	31.4457	0.692048	0.04992	4.09244
KEGG_PATHWAY	hsa05222:Small cell lung cancer	3	33.3333	0.00402592	AKT1, PIK3CA, PTEN	9	85	6879	26.9765	0.312825	0.0103672	4.32017
GOTERM_BP_DIRECT	GO:0005979~regulation of glycogen biosynthetic process	2	22.2222	0.00380578	AKT1, MTOR	9	8	16792	466.444	0.775687	0.0603799	5.16467
GOTERM_MF_DIRECT	GO:0043560~insulin receptor substrate binding	2	22.2222	0.00520216	GRB2, PIK3CA	9	11	16881	341.03	0.29124	0.0421172	5.19308
GOTERM_MF_DIRECT	GO:0005515~protein binding	9	100	0.00537136	AKT1, PDPK1, GRB2, STK11, RHOA, PIK3CA, MTOR, PTEN, IRS1	9	8785	16881	1.92157	0.299153	0.0387264	5.35782
KEGG_PATHWAY	hsa04066:HIF-1 signaling pathway	3	33.3333	0.00510945	AKT1, PIK3CA, MTOR	9	96	6879	23.8854	0.378983	0.0127931	5.45356
KEGG_PATHWAY	hsa04915:Estrogen signaling pathway	3	33.3333	0.005426	AKT1, GRB2, PIK3CA	9	99	6879	23.1616	0.397093	0.0132273	5.78236
GOTERM_BP_DIRECT	GO:0010907~positive regulation of glucose metabolic process	2	22.2222	0.00428061	AKT1, IRS1	9	9	16792	414.617	0.813924	0.0650517	5.79137
GOTERM_CC_DIRECT	GO:0005942~phosphatidylinositol 3-kinase complex	2	22.2222	0.00613042	PIK3CA, MTOR	9	14	18224	289.27	0.312784	0.0895139	5.99692
GOTERM_BP_DIRECT	GO:0001944~vasculature development	2	22.2222	0.00570392	STK11, PIK3CA	9	12	16792	310.963	0.89379	0.0826293	7.64697
GOTERM_BP_DIRECT	GO:0046889~positive regulation of lipid biosynthetic process	2	22.2222	0.00570392	AKT1, MTOR	9	12	16792	310.963	0.89379	0.0826293	7.64697
GOTERM_BP_DIRECT	GO:0031641~regulation of myelination	2	22.2222	0.00617795	AKT1, MTOR	9	13	16792	287.043	0.911899	0.0860441	8.25742
GOTERM_CC_DIRECT	GO:0005737~cytoplasm	7	77.7778	0.00882672	AKT1, PDPK1, GRB2, STK11, MTOR, PTEN, IRS1	9	5222	18224	2.71433	0.41773	0.10252	8.53039
GOTERM_BP_DIRECT	GO:0048009~insulin-like growth factor receptor signaling pathway	2	22.2222	0.00665179	AKT1, IRS1	9	14	16792	266.54	0.926921	0.0892039	8.86387
GOTERM_BP_DIRECT	GO:0045725~positive regulation of glycogen biosynthetic process	2	22.2222	0.00712544	AKT1, IRS1	9	15	16792	248.77	0.939382	0.0921363	9.46635
KEGG_PATHWAY	hsa04611:Platelet activation	3	33.3333	0.0092106	AKT1, RHOA, PIK3CA	9	130	6879	17.6385	0.577073	0.0218238	9.63382
KEGG_PATHWAY	hsa04380:Osteoclast differentiation	3	33.3333	0.00934793	AKT1, GRB2, PIK3CA	9	131	6879	17.5038	0.58249	0.0215995	9.77085
KEGG_PATHWAY	hsa04550:Signaling pathways regulating pluripotency of stem cells	3	33.3333	0.0106257	AKT1, GRB2, PIK3CA	9	140	6879	16.3786	0.629715	0.02394	11.0368
KEGG_PATHWAY	hsa04630:Jak-STAT signaling pathway	3	33.3333	0.0113678	AKT1, GRB2, PIK3CA	9	145	6879	15.8138	0.654673	0.024998	11.7646
GOTERM_BP_DIRECT	GO:0010975~regulation of neuron projection development	2	22.2222	0.00901804	AKT1, PTEN	9	19	16792	196.398	0.971307	0.111633	11.837
GOTERM_BP_DIRECT	GO:0050771~negative regulation of axonogenesis	2	22.2222	0.00901804	RHOA, PTEN	9	19	16792	196.398	0.971307	0.111633	11.837
GOTERM_MF_DIRECT	GO:0030295~protein kinase activator activity	2	22.2222	0.0122579	STK11, PIK3CA	9	26	16881	144.282	0.556926	0.0781768	11.8477
KEGG_PATHWAY	hsa04932:Non-alcoholic fatty liver disease (NAFLD)	3	33.3333	0.0122883	AKT1, PIK3CA, IRS1	9	151	6879	15.1854	0.683328	0.0263872	12.6598
GOTERM_BP_DIRECT	GO:1900182~positive regulation of protein localization to nucleus	2	22.2222	0.00996315	AKT1, STK11	9	21	16792	177.693	0.980261	0.118929	12.9992
GOTERM_BP_DIRECT	GO:0050772~positive regulation of axonogenesis	2	22.2222	0.00996315	STK11, RHOA	9	21	16792	177.693	0.980261	0.118929	12.9992
KEGG_PATHWAY	hsa04022:cGMP-PKG signaling pathway	3	33.3333	0.013403	AKT1, RHOA, IRS1	9	158	6879	14.5127	0.714898	0.0281177	13.7328
GOTERM_MF_DIRECT	GO:0005158~insulin receptor binding	2	22.2222	0.0146	PDPK1, IRS1	9	31	16881	121.011	0.621184	0.0844642	13.9616
GOTERM_BP_DIRECT	GO:0007281~germ cell development	2	22.2222	0.0142064	AKT1, MTOR	9	30	16792	124.385	0.996335	0.160775	18.0439
GOTERM_BP_DIRECT	GO:0090004~positive regulation of establishment of protein localization to plasma membrane	2	22.2222	0.0142064	AKT1, PDPK1	9	30	16792	124.385	0.996335	0.160775	18.0439
GOTERM_BP_DIRECT	GO:0046326~positive regulation of glucose import	2	22.2222	0.0142064	AKT1, IRS1	9	30	16792	124.385	0.996335	0.160775	18.0439
GOTERM_BP_DIRECT	GO:0021510~spinal cord development	2	22.2222	0.0142064	AKT1, MTOR	9	30	16792	124.385	0.996335	0.160775	18.0439
GOTERM_BP_DIRECT	GO:0071364~cellular response to epidermal growth factor stimulus	2	22.2222	0.0156173	AKT1, PDPK1	9	33	16792	113.077	0.997909	0.170538	19.6601
GOTERM_MF_DIRECT	GO:0005080~protein kinase C binding	2	22.2222	0.0215973	AKT1, IRS1	9	46	16881	81.5507	0.763319	0.113156	20.0076
KEGG_PATHWAY	hsa04024:cAMP signaling pathway	3	33.3333	0.0205877	AKT1, RHOA, PIK3CA	9	198	6879	11.5808	0.855524	0.042081	20.3666
GOTERM_BP_DIRECT	GO:0071902~positive regulation of protein serine/threonine kinase activity	2	22.2222	0.0165569	STK11, RHOA	9	35	16792	106.616	0.998562	0.175097	20.7201
GOTERM_BP_DIRECT	GO:0010507~negative regulation of autophagy	2	22.2222	0.0170264	AKT1, MTOR	9	36	16792	103.654	0.998808	0.174972	21.2448
KEGG_PATHWAY	hsa05203:Viral carcinogenesis	3	33.3333	0.0219826	GRB2, RHOA, PIK3CA	9	205	6879	11.1854	0.873459	0.0439442	21.5994
KEGG_PATHWAY	hsa04015:Rap1 signaling pathway	3	33.3333	0.0230033	AKT1, RHOA, PIK3CA	9	210	6879	10.919	0.885169	0.0450046	22.4905
GOTERM_BP_DIRECT	GO:0030163~protein catabolic process	2	22.2222	0.019371	AKT1, MTOR	9	41	16792	91.0136	0.999532	0.191843	23.8174
GOTERM_BP_DIRECT	GO:0051496~positive regulation of stress fiber assembly	2	22.2222	0.0198393	RHOA, MTOR	9	42	16792	88.8466	0.999612	0.19128	24.3218
GOTERM_BP_DIRECT	GO:0045429~positive regulation of nitric oxide biosynthetic process	2	22.2222	0.0203075	AKT1, MTOR	9	43	16792	86.7804	0.999678	0.190747	24.8229
GOTERM_BP_DIRECT	GO:0030838~positive regulation of actin filament polymerization	2	22.2222	0.0212432	GRB2, MTOR	9	45	16792	82.9235	0.999779	0.194121	25.8153
GOTERM_BP_DIRECT	GO:0060048~cardiac muscle contraction	2	22.2222	0.0212432	PIK3CA, MTOR	9	45	16792	82.9235	0.999779	0.194121	25.8153
GOTERM_BP_DIRECT	GO:0032147~activation of protein kinase activity	2	22.2222	0.0212432	STK11, PIK3CA	9	45	16792	82.9235	0.999779	0.194121	25.8153
GOTERM_BP_DIRECT	GO:0032956~regulation of actin cytoskeleton organization	2	22.2222	0.0221781	RHOA, MTOR	9	47	16792	79.3948	0.999848	0.197314	26.7947
GOTERM_BP_DIRECT	GO:0035176~social behavior	2	22.2222	0.0226452	MTOR, PTEN	9	48	16792	77.7407	0.999874	0.196678	27.2796
GOTERM_CC_DIRECT	GO:0042995~cell projection	2	22.2222	0.0324594	PDPK1, PTEN	9	75	18224	53.997	0.866396	0.285004	28.2409
GOTERM_BP_DIRECT	GO:0006661~phosphatidylinositol biosynthetic process	2	22.2222	0.0273061	PIK3CA, PTEN	9	58	16792	64.3372	0.999981	0.227714	31.9568
GOTERM_BP_DIRECT	GO:0048661~positive regulation of smooth muscle cell proliferation	2	22.2222	0.0282359	AKT1, MTOR	9	60	16792	62.1926	0.999987	0.229804	32.8559
GOTERM_BP_DIRECT	GO:0001933~negative regulation of protein phosphorylation	2	22.2222	0.0287005	MTOR, PTEN	9	61	16792	61.173	0.999989	0.228514	33.301
GOTERM_CC_DIRECT	GO:0016605~PML body	2	22.2222	0.0422271	MTOR, PTEN	9	98	18224	41.3243	0.928053	0.31338	35.2023
GOTERM_BP_DIRECT	GO:0032868~response to insulin	2	22.2222	0.0314842	MTOR, IRS1	9	67	16792	55.6949	0.999996	0.243212	35.9107
GOTERM_BP_DIRECT	GO:0006006~glucose metabolic process	2	22.2222	0.0314842	AKT1, PIK3CA	9	67	16792	55.6949	0.999996	0.243212	35.9107
GOTERM_BP_DIRECT	GO:0001938~positive regulation of endothelial cell proliferation	2	22.2222	0.0324105	AKT1, MTOR	9	69	16792	54.0805	0.999998	0.244797	36.758
GOTERM_BP_DIRECT	GO:0033138~positive regulation of peptidyl-serine phosphorylation	2	22.2222	0.0328734	AKT1, PIK3CA	9	70	16792	53.3079	0.999998	0.243298	37.1774
GOTERM_BP_DIRECT	GO:0048010~vascular endothelial growth factor receptor signaling pathway	2	22.2222	0.0337986	RHOA, PIK3CA	9	72	16792	51.8272	0.999999	0.244816	38.0081
GOTERM_MF_DIRECT	GO:0042802~identical protein binding	3	33.3333	0.0460769	AKT1, GRB2, PTEN	9	749	16881	7.51268	0.955549	0.21297	38.2642
GOTERM_BP_DIRECT	GO:0007584~response to nutrient	2	22.2222	0.034723	MTOR, PTEN	9	74	16792	50.4264	0.999999	0.24627	38.8278
GOTERM_BP_DIRECT	GO:0030334~regulation of cell migration	2	22.2222	0.034723	AKT1, RHOA	9	74	16792	50.4264	0.999999	0.24627	38.8278
KEGG_PATHWAY	hsa04973:Carbohydrate digestion and absorption	2	22.2222	0.047837	AKT1, PIK3CA	9	42	6879	36.3968	0.989525	0.0906038	41.5288
GOTERM_BP_DIRECT	GO:0050731~positive regulation of peptidyl-tyrosine phosphorylation	2	22.2222	0.0384129	STK11, MTOR	9	82	16792	45.5068	1	0.264418	42.0008
GOTERM_BP_DIRECT	GO:0060070~canonical Wnt signaling pathway	2	22.2222	0.0388732	STK11, PTEN	9	83	16792	44.9585	1	0.262694	42.3857
GOTERM_MF_DIRECT	GO:0005088~Ras guanyl-nucleotide exchange factor activity	2	22.2222	0.053228	GRB2, IRS1	9	115	16881	32.6203	0.972948	0.227295	42.8359
GOTERM_CC_DIRECT	GO:0031982~vesicle	2	22.2222	0.0548378	AKT1, RHOA	9	128	18224	31.6389	0.967946	0.349517	43.2886
GOTERM_CC_DIRECT	GO:0005634~nucleus	6	66.6667	0.0557282	AKT1, GRB2, STK11, MTOR, PTEN, IRS1	9	5415	18224	2.24364	0.969737	0.322026	43.8237
GOTERM_BP_DIRECT	GO:0006469~negative regulation of protein kinase activity	2	22.2222	0.0462129	AKT1, PDPK1	9	99	16792	37.6925	1	0.300004	48.2119
GOTERM_BP_DIRECT	GO:0051091~positive regulation of sequence-specific DNA binding transcription factor activity	2	22.2222	0.0489526	AKT1, PTEN	9	105	16792	35.5386	1	0.310112	50.2427
GOTERM_CC_DIRECT	GO:0030027~lamellipodium	2	22.2222	0.0681289	RHOA, PIK3CA	9	160	18224	25.3111	0.986488	0.349765	50.817
GOTERM_CC_DIRECT	GO:0005911~cell-cell junction	2	22.2222	0.0730708	AKT1, GRB2	9	172	18224	23.5452	0.990231	0.343464	53.3779
KEGG_PATHWAY	hsa04370:VEGF signaling pathway	2	22.2222	0.0688114	AKT1, PIK3CA	9	61	6879	25.0601	0.99868	0.126557	54.1815
KEGG_PATHWAY	hsa04210:Apoptosis	2	22.2222	0.069904	AKT1, PIK3CA	9	62	6879	24.6559	0.998817	0.1261	54.7667
GOTERM_BP_DIRECT	GO:0050900~leukocyte migration	2	22.2222	0.0566777	GRB2, PIK3CA	9	122	16792	30.5865	1	0.345287	55.5781
GOTERM_BP_DIRECT	GO:1901796~regulation of signal transduction by p53 class mediator	2	22.2222	0.0575829	AKT1, STK11	9	124	16792	30.0932	1	0.344725	56.1673
KEGG_PATHWAY	hsa05212:Pancreatic cancer	2	22.2222	0.0731751	AKT1, PIK3CA	9	65	6879	23.5179	0.999147	0.129399	56.4781
GOTERM_BP_DIRECT	GO:0038096~Fc-gamma receptor signaling pathway involved in phagocytosis	2	22.2222	0.0589393	GRB2, PIK3CA	9	127	16792	29.3823	1	0.346383	57.0366
GOTERM_BP_DIRECT	GO:0001934~positive regulation of protein phosphorylation	2	22.2222	0.0589393	AKT1, MTOR	9	127	16792	29.3823	1	0.346383	57.0366
GOTERM_BP_DIRECT	GO:0030036~actin cytoskeleton organization	2	22.2222	0.060294	PDPK1, RHOA	9	130	16792	28.7043	1	0.34798	57.8887
GOTERM_BP_DIRECT	GO:0043524~negative regulation of neuron apoptotic process	2	22.2222	0.0611962	PDPK1, PIK3CA	9	132	16792	28.2694	1	0.347405	58.4475
GOTERM_BP_DIRECT	GO:0006914~autophagy	2	22.2222	0.061647	STK11, MTOR	9	133	16792	28.0568	1	0.344761	58.7242
KEGG_PATHWAY	hsa00562:Inositol phosphate metabolism	2	22.2222	0.0796872	PIK3CA, PTEN	9	71	6879	21.5305	0.999557	0.138015	59.7112
GOTERM_BP_DIRECT	GO:0007050~cell cycle arrest	2	22.2222	0.0652467	STK11, MTOR	9	141	16792	26.4649	1	0.356492	60.8725
GOTERM_MF_DIRECT	GO:0000287~magnesium ion binding	2	22.2222	0.0927035	STK11, PTEN	9	204	16881	18.3889	0.998373	0.348226	63.0162
KEGG_PATHWAY	hsa05100:Bacterial invasion of epithelial cells	2	22.2222	0.087234	RHOA, PIK3CA	9	78	6879	19.5983	0.999794	0.147995	63.1841
GOTERM_CC_DIRECT	GO:0005768~endosome	2	22.2222	0.0946239	GRB2, RHOA	9	225	18224	17.999	0.997674	0.39668	63.2011
KEGG_PATHWAY	hsa04666:Fc gamma R-mediated phagocytosis	2	22.2222	0.0936596	AKT1, PIK3CA	9	84	6879	18.1984	0.999893	0.155798	65.9241
KEGG_PATHWAY	hsa04914:Progesterone-mediated oocyte maturation	2	22.2222	0.0968575	AKT1, PIK3CA	9	87	6879	17.5709	0.999923	0.158241	67.2175
GOTERM_BP_DIRECT	GO:0006974~cellular response to DNA damage stimulus	2	22.2222	0.0949224	AKT1, STK11	9	208	16792	17.9402	1	0.473191	75.018
